# Supplementary material for: Hexagonal Mg2B2 and Ca2B2 monolayers as promising anode materials for Li-ion and Na-ion batteries
Source: Royal Society of Chemistry journal article supplement (doi:10.1039/d4nr01786b), 2024-01-01
Supplement: d4nr01786b1.pdf [file d4nr01786b1.pdf]

Supplementary Information

**Hexagonal Mg<sub>2</sub>B<sub>2</sub> and Ca<sub>2</sub>B<sub>2</sub> monolayers as promising anode materials for Li-ion and Na-ion batteries**

Yuqi Sun, Kaiqi Li, Bing Wang, Weiming Zhang, Erpeng Wang, Jian Zhou\* and

Zhimei Sun\*

*School of Materials Science and Engineering, Beihang University, Beijing 100191,*

*China*

\*Corresponding authors.

*E-mail addresses:* [jzhou@buaa.edu.cn](mailto:jzhou@buaa.edu.cn) (J.Zhou), [zmsun@buaa.edu.cn](mailto:zmsun@buaa.edu.cn) (Z. Sun)

# 1. Dynamic stabilities of bulk $MB_2$ and $M_2B_2$ monolayers

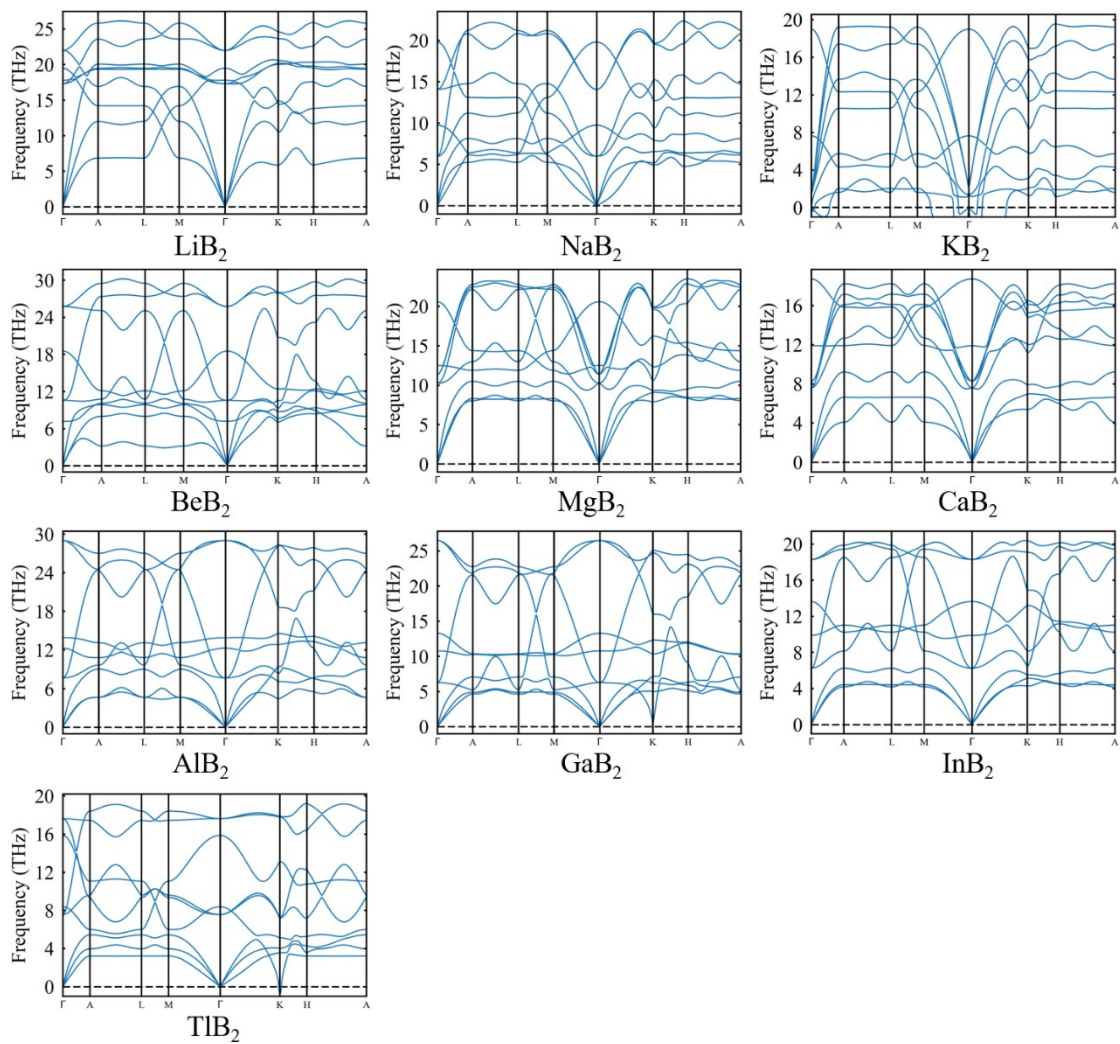

**Fig. S1.** Phonon spectra along the high symmetry directions for bulk  $MB_2$ .

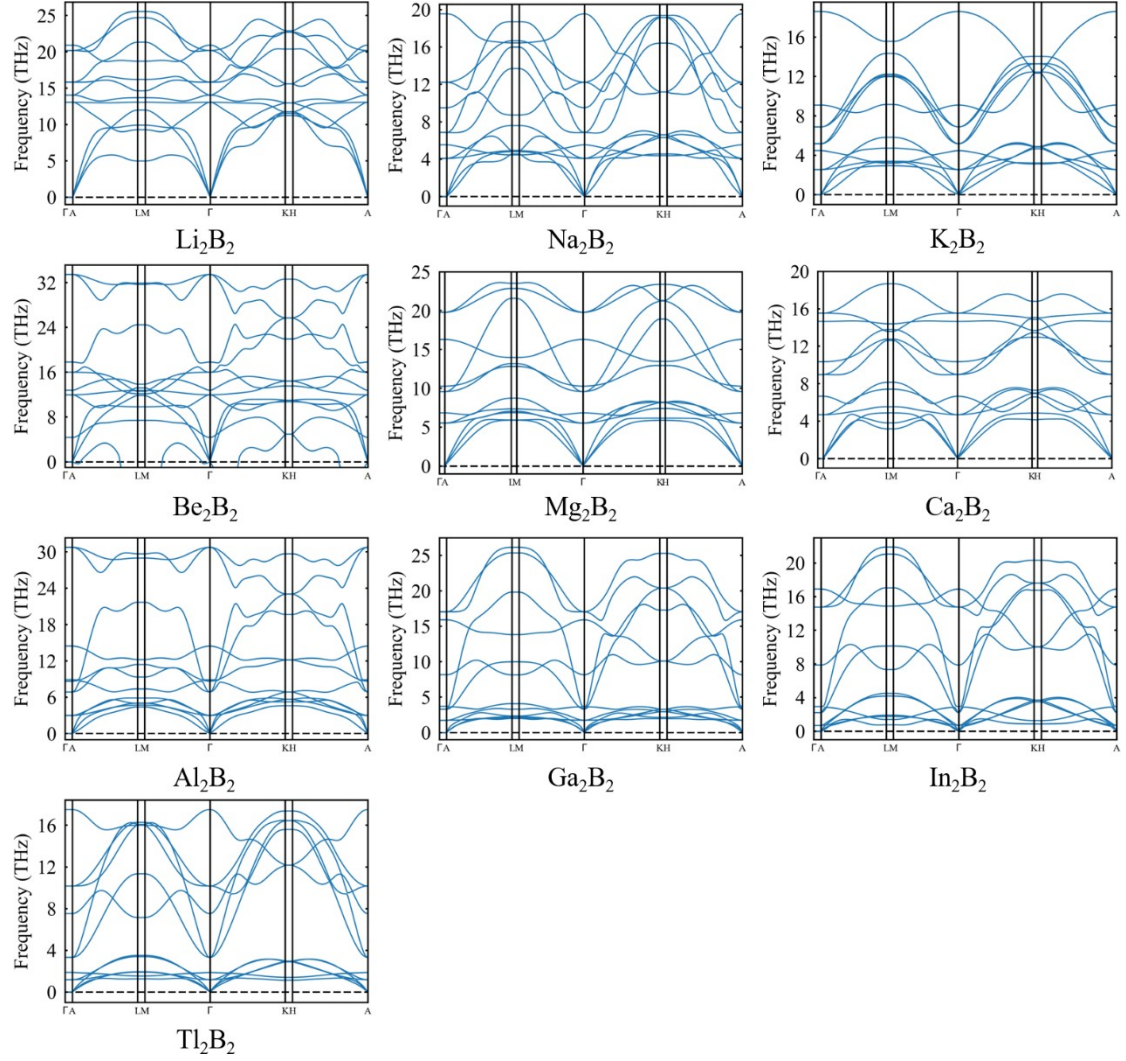

**Fig. S2.** Phonon spectra along the high symmetry directions for  $M_2B_2$  monolayers.

## 2. Mechanical stabilities and properties of $M_2B_2$ monolayers

For a 2D hexagonal crystal, there are two independent elastic constants, namely  $c_{11}$  and  $c_{12}$ . The stiffness tensor  $c_{ij}$  can be obtained using the following equation,

$$E = \frac{1}{2}c_{11}\varepsilon_{xx}^2 + \frac{1}{2}c_{22}\varepsilon_{yy}^2 + c_{12}\varepsilon_{xx}\varepsilon_{yy} \quad (1)$$

Where  $E$  is the elastic strain energy,  $\varepsilon_{xx}$  and  $\varepsilon_{yy}$  are the tensile strains along  $x$ -direction

and  $y$ -direction, respectively. Applying uniaxial strain  $\varepsilon_0$  along  $x$ -direction leads to

$\varepsilon_{yy} = 0$  and  $E = \frac{1}{2}c_{11}\varepsilon_{xx}^2$  and then the  $c_{11}$  is two times of the coefficient of the quadratic

term obtained by fitting  $E(\varepsilon_0)$  as a function of  $\varepsilon_0$  with a quadratic polynomial. Similarly,

applying equibiaxial strain  $\varepsilon_0$  leads to  $\varepsilon_{xx} = \varepsilon_{yy}$  and then the  $c_{11}$  can be acquired by fitting

$E = (\frac{1}{2}c_{11} + \frac{1}{2}c_{22} + c_{12})\varepsilon_{xx}^2$ . In the end,  $c_{66} = \frac{1}{2}(c_{11} - c_{12})$ . The mechanically stable 2D

hexagonal crystal must satisfy  $c_{11} > 0$  and  $c_{11} > |c_{12}|$ . Young's modulus is defined by

$E = \frac{c_{11}^2 - c_{12}^2}{c_{11}}$  representing the strain response in the direction of applied uniaxial stress.

The shear modulus is defined by  $G = c_{66}$  for 2D hexagonal crystals reflecting the rigidity

of lattice to shear stress. The Poisson's ratio is defined by  $\mu = \frac{c_{12}}{c_{11}}$  representing the ratio

of transverse contraction to longitudinal expansion of lattice in the stretching force

direction. In this work, we applied the strain  $\varepsilon$  from -1.5% to 1.5% by the interment of

0.5% to calculate the elastic constants. The results of mechanical properties of MBenes

(M = Li, Na, K, Be, Mg, Ca, Al, Ga, In, Tl) are plotted in Fig. S3 and Fig. S4 and listed

in Table S1.

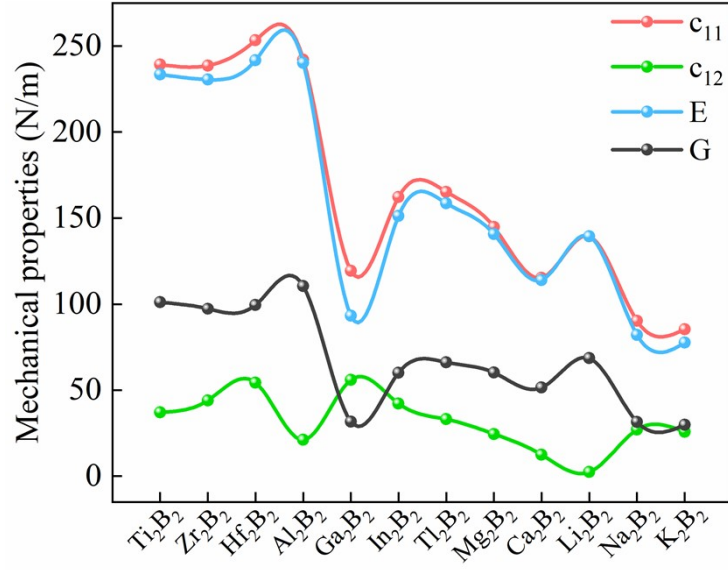

**Fig. S3.** Mechanical properties (N/m) of hexagonal  $M_2B_2$  monolayers including elastic constants ( $c_{ij}$ ), Young's modulus ( $E$ ) and shear modulus ( $G$ ).

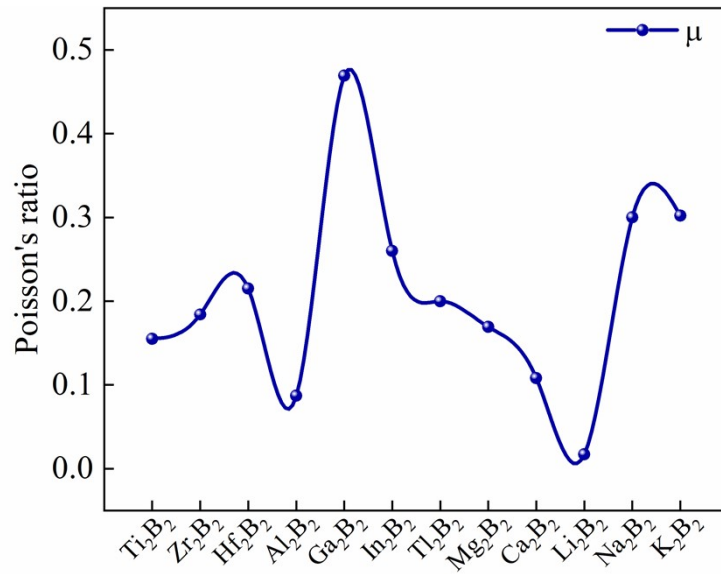

**Fig. S4.** The Poisson's ratio ( $\mu$ ) of hexagonal  $M_2B_2$  monolayers.

**Table S1.** Elastic constants ( $c_{ij}$ , N/m), Young's modulus ( $E$ , N/m), shear modulus ( $G$ , N/m) and Poisson's ratio ( $\mu$ ) of  $M_2B_2$  monolayers.

| formula                        | $c_{11}$ | $c_{12}$ | $c_{66}$ | Young's modulus $E$ | Shear modulus $G$ | Poisson's ratio $\mu$ |
|--------------------------------|----------|----------|----------|---------------------|-------------------|-----------------------|
| Al <sub>2</sub> B <sub>2</sub> | 242      | 21       | 110      | 240                 | 110               | 0.09                  |
| Ga <sub>2</sub> B <sub>2</sub> | 119      | 56       | 32       | 93                  | 32                | 0.47                  |
| In <sub>2</sub> B <sub>2</sub> | 162      | 42       | 60       | 151                 | 60                | 0.26                  |
| Tl <sub>2</sub> B <sub>2</sub> | 165      | 33       | 66       | 159                 | 66                | 0.20                  |
| Mg <sub>2</sub> B <sub>2</sub> | 145      | 24       | 60       | 141                 | 60                | 0.17                  |
| Ca <sub>2</sub> B <sub>2</sub> | 115      | 12       | 51       | 114                 | 51                | 0.11                  |
| Li <sub>2</sub> B <sub>2</sub> | 139      | 2        | 69       | 139                 | 69                | 0.02                  |
| Na <sub>2</sub> B <sub>2</sub> | 90       | 27       | 32       | 82                  | 32                | 0.30                  |
| K <sub>2</sub> B <sub>2</sub>  | 85       | 26       | 30       | 78                  | 30                | 0.30                  |
| Ti <sub>2</sub> B <sub>2</sub> | 239      | 37       | 101      | 234                 | 101               | 0.16                  |
| Zr <sub>2</sub> B <sub>2</sub> | 239      | 44       | 97       | 230                 | 97                | 0.18                  |
| Hf <sub>2</sub> B <sub>2</sub> | 253      | 54       | 99       | 242                 | 99                | 0.22                  |

### 3. Exfoliation of MB<sub>2</sub> and M<sub>2</sub>B<sub>2</sub> monolayers

The exfoliation energies of MB<sub>2</sub> and M<sub>2</sub>B<sub>2</sub> monolayers are calculated according to the following equation,

$$E_{exf} = (E_{exfMB_2} - E_{MB_2})/2S \quad (2)$$

where  $E_{MB_2}$  and  $E_{exfMB_2}$  represent the total energies of bulk MB<sub>2</sub> and exfoliated MB<sub>2</sub>, respectively. S represents the area of exfoliation surfaces of MB<sub>2</sub>.

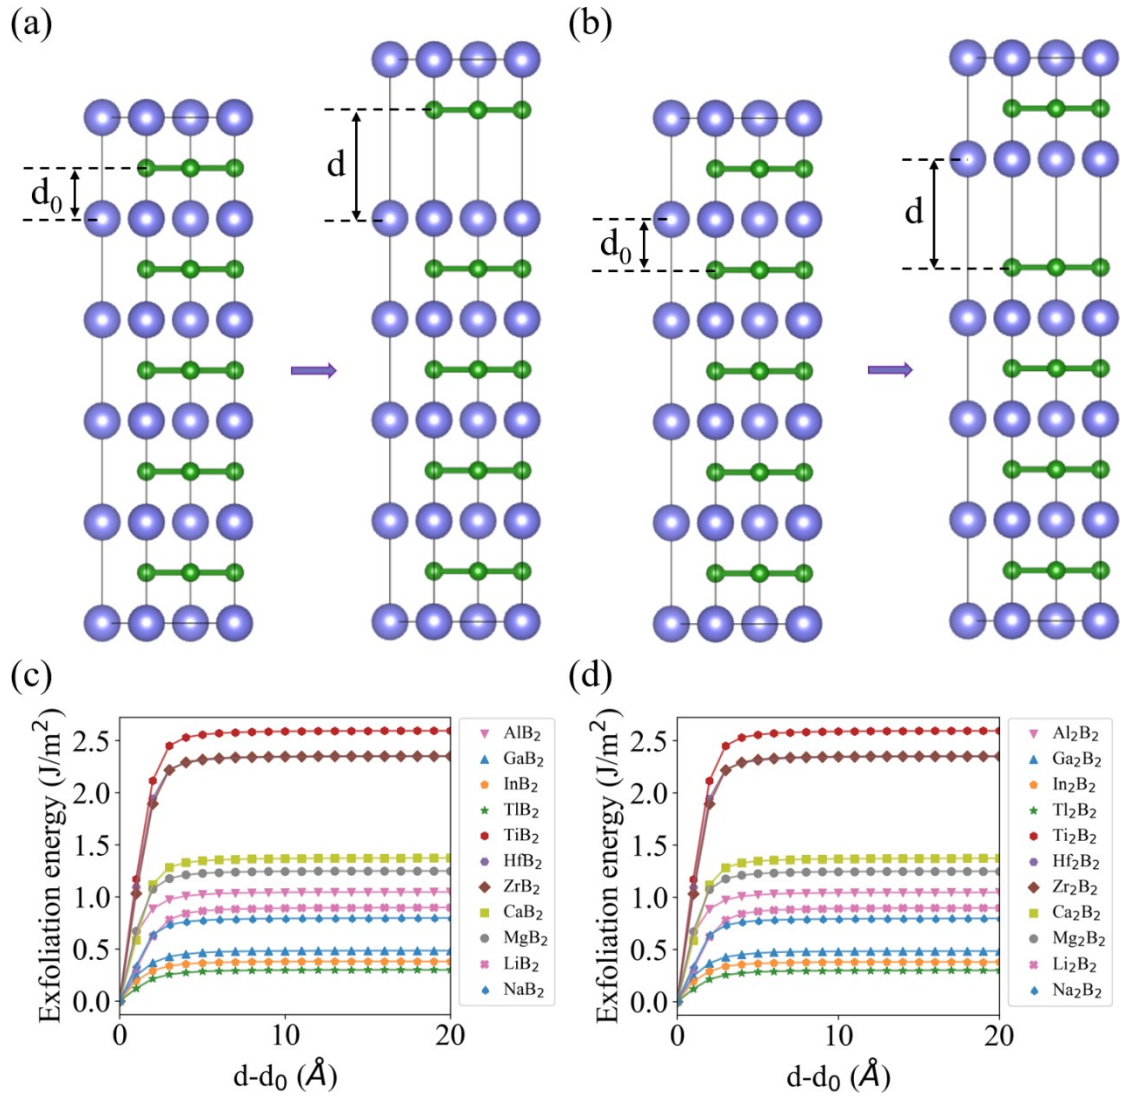

**Fig. S5.** Schematic diagrams of exfoliation for (a) MB<sub>2</sub> and (b) M<sub>2</sub>B<sub>2</sub> monolayers and exfoliation energies of (c) MB<sub>2</sub> and (d) M<sub>2</sub>B<sub>2</sub> monolayers.  $d_0$  and  $d$  represent the distance between metal and boron layers in the original bulk MB<sub>2</sub> and the distance between the monolayer and the remaining piece of MB<sub>2</sub> after exfoliation, respectively.

**Table S2.** Exfoliation energies (J/m<sup>2</sup>) of MB<sub>2</sub> and M<sub>2</sub>B<sub>2</sub> monolayers.

| M element | M <sub>2</sub> B <sub>2</sub> | MB <sub>2</sub> |
|-----------|-------------------------------|-----------------|
| Ti        | 2.59374                       | 2.59375         |
| Zr        | 2.35128                       | 2.35125         |



|    |         |         |
|----|---------|---------|
| Hf | 2.34809 | 2.34796 |
| Ca | 1.37238 | 1.37236 |
| Mg | 1.24836 | 1.24839 |
| Al | 1.04623 | 1.04622 |
| Li | 0.89686 | 0.89687 |
| Na | 0.79645 | 0.79645 |
| Ga | 0.48395 | 0.48391 |
| In | 0.38101 | 0.38079 |
| Tl | 0.29986 | 0.29984 |

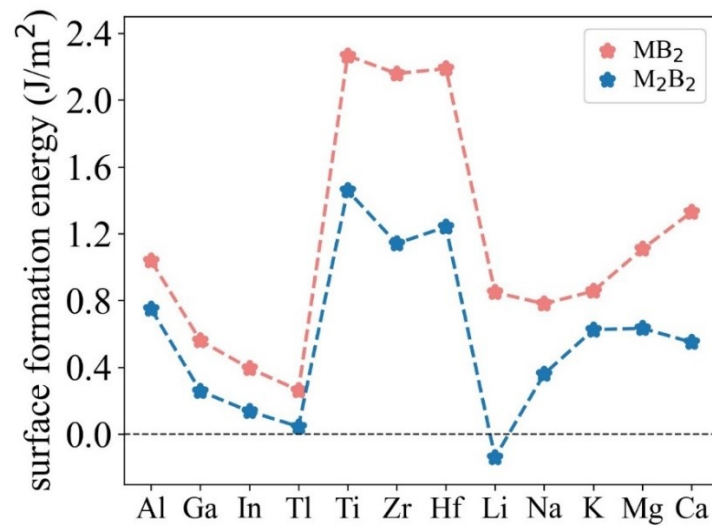

**Fig. S6.** Surface formation energies ( $\text{J/m}^2$ ) of  $\text{MB}_2$  and  $\text{M}_2\text{B}_2$  monolayers.

**Table S3.** Surface formation energies ( $\text{J/m}^2$ ) of  $\text{M}_2\text{B}_2$  and  $\text{MB}_2$  monolayers and corresponding bulk M energies ( $\text{eV/atom}$ ) used in the calculations of surface formation energies.

| M  | surface formation energy of $\text{M}_2\text{B}_2$ | surface formation energy of $\text{MB}_2$ | bulk M energy |
|----|----------------------------------------------------|-------------------------------------------|---------------|
| Al | 0.750                                              | 1.038                                     | -4.085        |
| Ga | 0.258                                              | 0.561                                     | -3.196        |
| In | 0.137                                              | 0.395                                     | -2.883        |
| Tl | 0.046                                              | 0.264                                     | -2.547        |
| Ti | 1.458                                              | 2.266                                     | -8.435        |



|    |        |       |         |
|----|--------|-------|---------|
| Zr | 1.141  | 2.158 | -9.056  |
| Hf | 1.241  | 2.188 | -10.381 |
| Li | -0.138 | 0.849 | -2.083  |
| Na | 0.360  | 0.781 | -1.472  |
| K  | 0.625  | 0.856 | -1.162  |
| Mg | 0.634  | 1.109 | -1.795  |
| Ca | 0.550  | 1.329 | -2.166  |

#### 4. Thermal stabilities of $\text{Mg}_2\text{B}_2$ and $\text{Ca}_2\text{B}_2$ monolayers

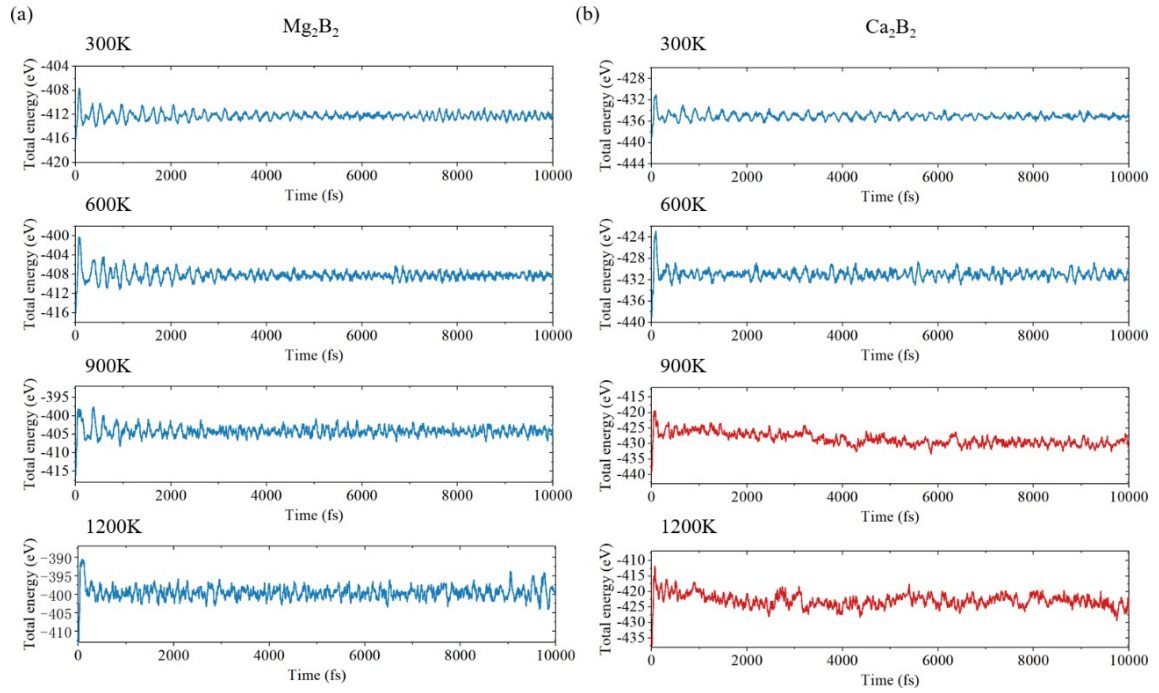

**Fig. S7.** Total energy fluctuations of (a)  $\text{Mg}_2\text{B}_2$  and (b)  $\text{Ca}_2\text{B}_2$  in the AIMD simulation at 300 K, 600K, 900 K and 1200 K for 10 ps.

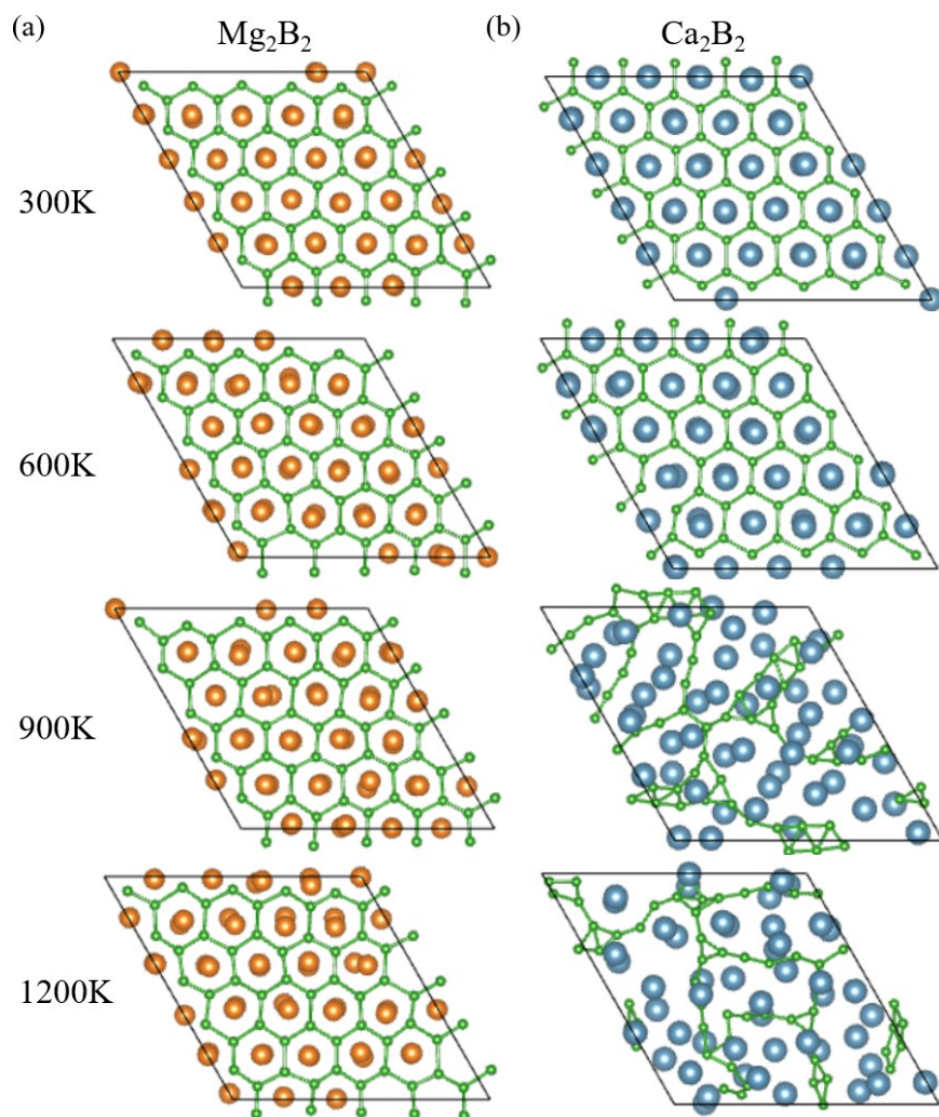

**Fig. S8.** Snapshots of (a)  $\text{Mg}_2\text{B}_2$  and (b)  $\text{Ca}_2\text{B}_2$  in the AIMD simulation at 300 K, 600K, 900 K and 1200 K for 10 ps.

## 5. HSE06 functional calculations

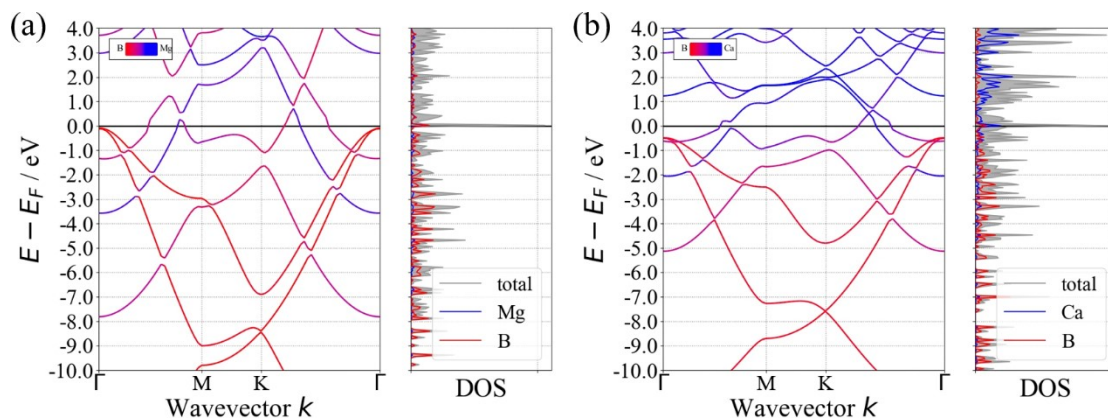

**Fig. S9.** HSE06 projected electronic band structures and DOS of (a)  $\text{Mg}_2\text{B}_2$  and (b)  $\text{Ca}_2\text{B}_2$  monolayers.

## 6. Li/Na adsorption on $\text{Mg}_2\text{B}_2$ and $\text{Ca}_2\text{B}_2$ monolayers

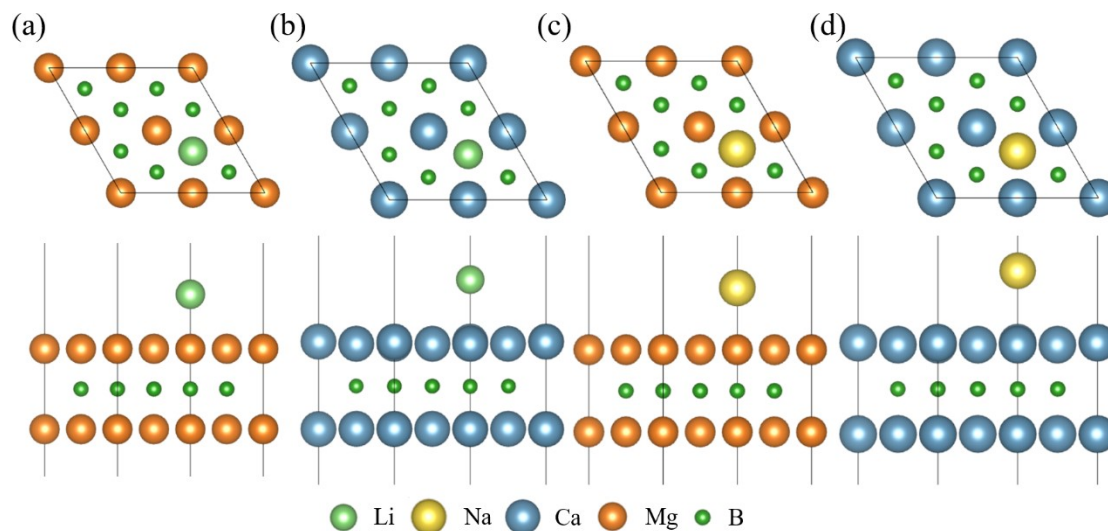

**Fig. S10.** Configurations of  $\text{Li}_{0.25}/\text{Na}_{0.25}\text{M}_2\text{B}_2$  for the most stable sites. The hollow site is the favorable site for Li/Na ions on the surfaces of  $\text{Mg}_2\text{B}_2$  and  $\text{Ca}_2\text{B}_2$ .

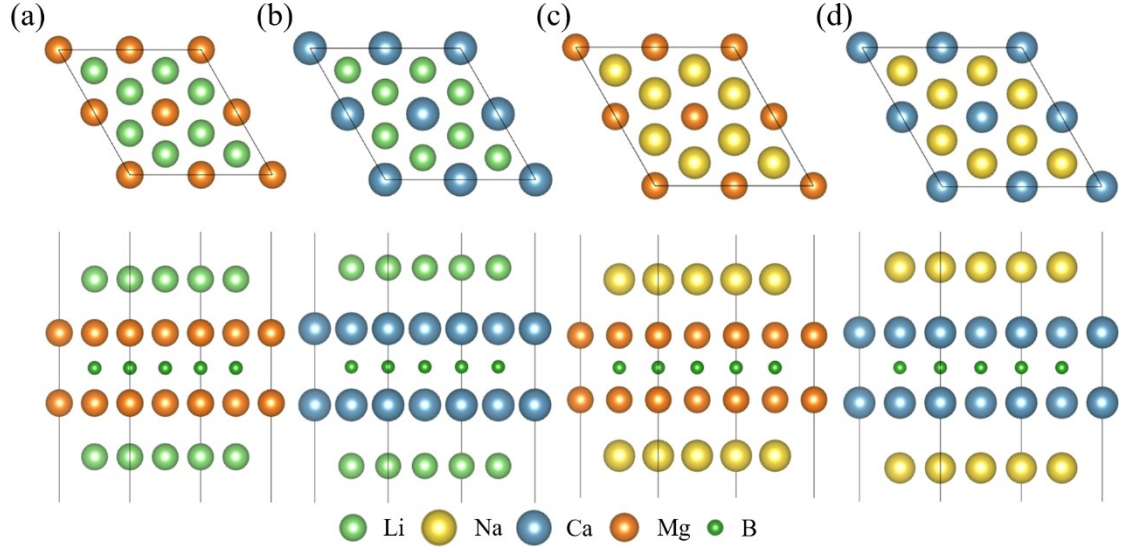

**Fig. S11.** Configurations of  $\text{Li}_4/\text{Na}_4\text{M}_2\text{B}_2$  for the hollow sites. All these configurations possess positive adsorption energies.

**Table S4.** Average adsorption energies ( $E_{\text{ave}}$ ) of the  $\text{Li}_4/\text{Na}_4\text{M}_2\text{B}_2$  and  $\text{Li}_2/\text{Na}_2\text{M}_2\text{B}_2$  configurations.

| configuration                      | $E_{\text{ave}} (x=4)$ | $E_{\text{ave}} (x=2)$ |
|------------------------------------|------------------------|------------------------|
| $\text{Li}_x\text{Ca}_2\text{B}_2$ | 0.794                  | -0.279                 |
| $\text{Li}_x\text{Mg}_2\text{B}_2$ | 0.928                  | -0.431                 |
| $\text{Na}_x\text{Ca}_2\text{B}_2$ | 1.931                  | -0.345                 |
| $\text{Na}_x\text{Mg}_2\text{B}_2$ | 2.554                  | -0.272                 |

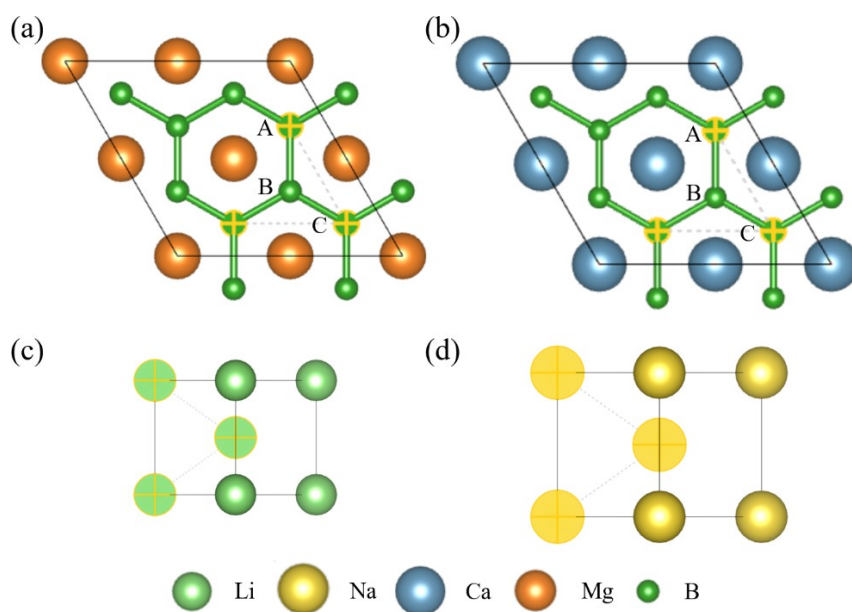

**Fig. S12.** Comparison of the (0 0 1) crystallographic planes of (a)  $\text{Mg}_2\text{B}_2$  and (b)  $\text{Ca}_2\text{B}_2$  and the (1 1 0) crystal planes of body-centered cubic (c) Li and (d) Na. The concerned S1 sites and S1-S1-S1 angles are labeled by yellow crosses.

**Table S5.** Mismatching ratios between  $d_{\text{A-C}}$  and  $d_{\text{b-c}}$ .

|             | $\text{Li}_{\text{bcc}}(1\ 1\ 0)$ | $\text{Na}_{\text{bcc}}(1\ 1\ 0)$ |
|-------------|-----------------------------------|-----------------------------------|
| MgB (0 0 1) | 2.7%                              | -16.4%                            |
| CaB (0 0 1) | 11.2%                             | -8.4%                             |

**Table S6.** Mismatching ratios between  $d_{\text{A-B}}$  and  $d_{\text{b-c}}$ .

|             | $\text{Li}_{\text{bcc}}(1\ 1\ 0)$ | $\text{Na}_{\text{bcc}}(1\ 1\ 0)$ |
|-------------|-----------------------------------|-----------------------------------|
| MgB (0 0 1) | -40.7%                            | -51.2%                            |
| CaB (0 0 1) | -35.8%                            | -47.1%                            |



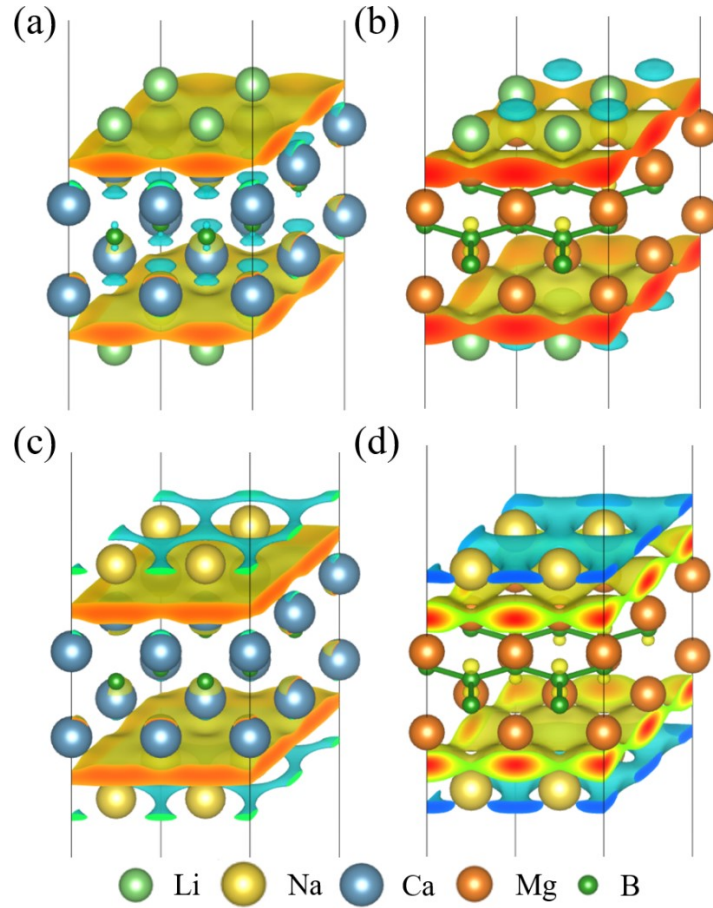

**Fig. S13.** Charge difference densities of the (a)  $\text{Li}_2\text{Ca}_2\text{B}_2$ , (b)  $\text{Li}_2\text{Mg}_2\text{B}_2$ , (c)  $\text{Na}_2\text{Ca}_2\text{B}_2$  and (d)  $\text{Na}_2\text{Mg}_2\text{B}_2$  configurations. The yellow and blue cloud areas represent electron gains and losses.

**Table S7.** Distances between the ion layers and the monolayers ( $d_1$ , in Å), thicknesses of the monolayers ( $d_2$ , in Å), bond lengths of M-M ( $l_{\text{M-M}}$ , in Å), M-B ( $l_{\text{M-B}}$ , in Å) and B-B ( $l_{\text{B-B}}$ , in Å), cross-section areas ( $S_{\text{cross}}$ , in Å<sup>2</sup>),  $S_{\text{cross}}$  change ratios and average adsorption energies ( $E_{\text{ave}}$ , in eV) of different configurations.

| configuration           | $d_1$ | $d_2$ | $l_{\text{M-M}}$ | $l_{\text{M-B}}$ | $l_{\text{B-B}}$ | $S_{\text{cross}}$ | $S_{\text{cross}}$ change ratio | $E_{\text{ave}}$ |
|-------------------------|-------|-------|------------------|------------------|------------------|--------------------|---------------------------------|------------------|
| $\text{Ca}_2\text{B}_2$ | 3.714 | 3.333 | 2.674            | 1.924            | 38.485           |                    |                                 |                  |

|                                                |       |       |       |       |        |        |              |
|------------------------------------------------|-------|-------|-------|-------|--------|--------|--------------|
| Mg <sub>2</sub> B <sub>2</sub>                 | 3.393 | 3.078 | 2.457 | 1.777 | 32.825 |        |              |
| LiCa <sub>2</sub> B <sub>2</sub>               | 2.828 | 3.740 | 3.318 | 2.681 | 1.915  | 38.128 | -0.9% -0.266 |
| Li <sub>2</sub> Ca <sub>2</sub> B <sub>2</sub> | 2.769 | 3.780 | 3.307 | 2.687 | 1.909  | 37.891 | -1.5% -0.275 |
| NaCa <sub>2</sub> B <sub>2</sub>               | 3.235 | 3.715 | 3.354 | 2.685 | 1.937  | 38.974 | 1.3% -0.333  |
| Na <sub>2</sub> Ca <sub>2</sub> B <sub>2</sub> | 3.231 | 3.725 | 3.367 | 2.692 | 1.944  | 39.282 | 2.1% -0.345  |
| LiMg <sub>2</sub> B <sub>2</sub>               | 2.367 | 3.363 | 3.084 | 2.459 | 1.781  | 32.954 | 0.4% -0.399  |
| Li <sub>2</sub> Mg <sub>2</sub> B <sub>2</sub> | 2.362 | 3.367 | 3.086 | 2.451 | 1.781  | 32.980 | 0.5% -0.431  |
| NaMg <sub>2</sub> B <sub>2</sub>               | 2.860 | 3.293 | 3.133 | 2.442 | 1.809  | 33.996 | 3.6% -0.250  |
| Na <sub>2</sub> Mg <sub>2</sub> B <sub>2</sub> | 2.855 | 3.309 | 3.153 | 2.460 | 1.820  | 34.441 | 4.9% -0.272  |

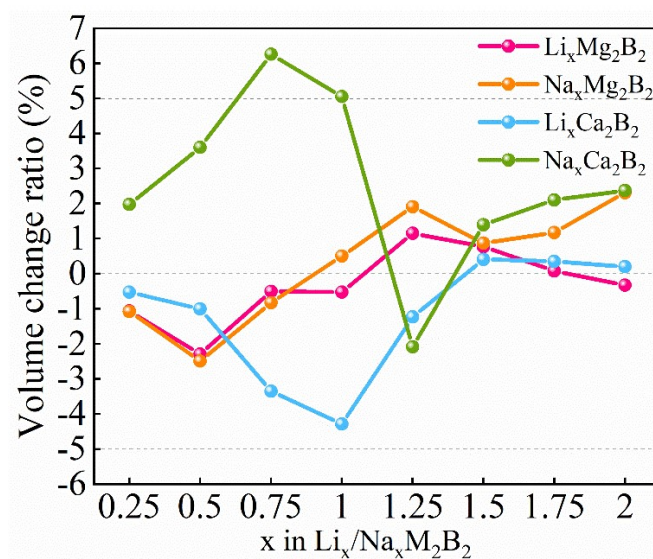

**Fig. S14.** Volume change ratios ( $\nu$ ) of the Li<sub>*x*</sub>/Na<sub>*x*</sub>M<sub>2</sub>B<sub>2</sub> configurations at different Li/Na concentrations (*x*, from 0 to 2 by step 0.25).



## 7. Electronic structures of $\text{Mg}_2\text{B}_2$ and $\text{Ca}_2\text{B}_2$ monolayers adsorbed with Li/Na ions

ions

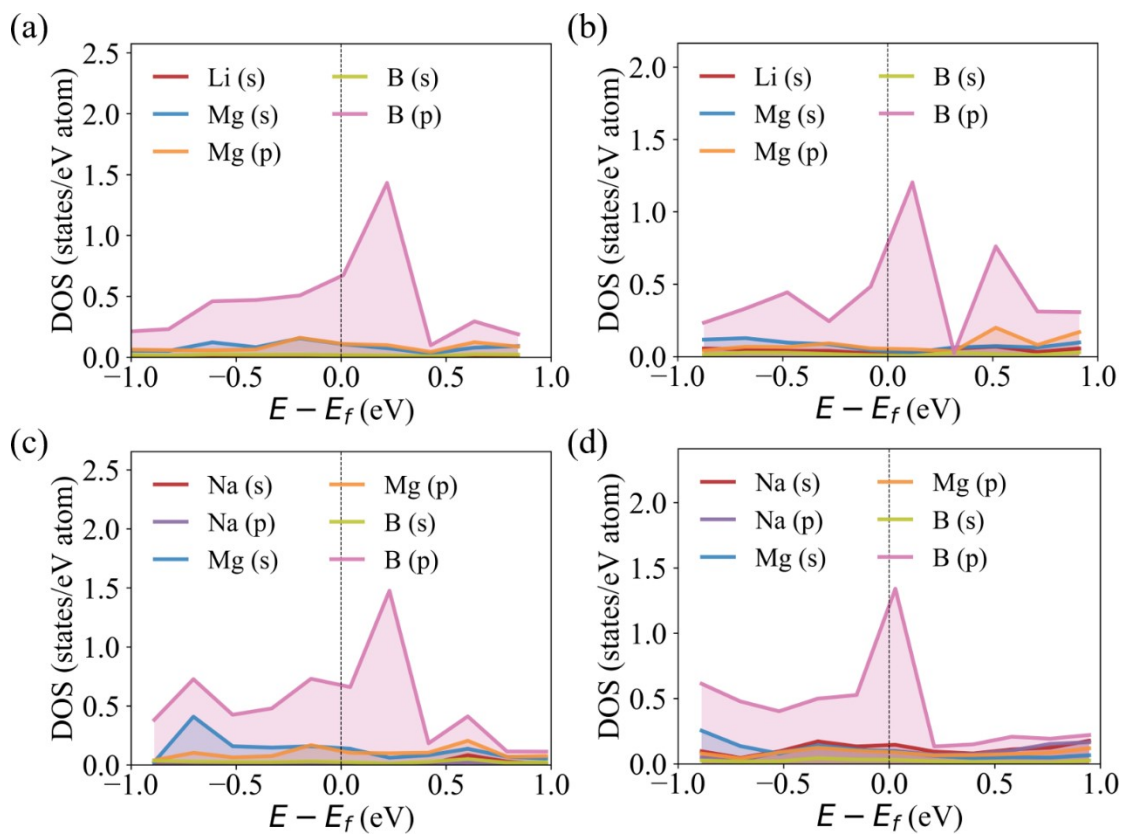

**Fig. S15.** Elemental projected DOS of the  $\text{Mg}_2\text{B}_2$  monolayer adsorbed with (a) one single Li atom, (b) one layer of Li atoms, (c) one single Na atom, and (d) one layer of Na atoms, respectively. The Fermi energy levels are set as zero.

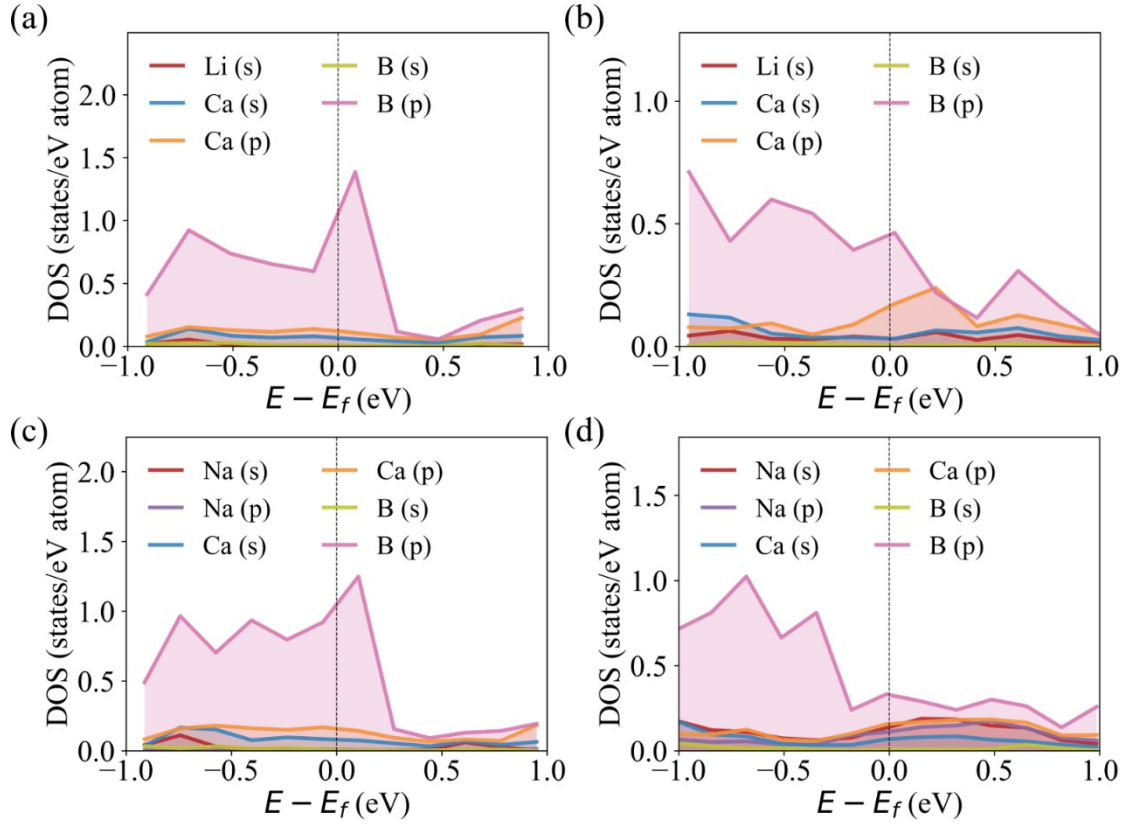

**Fig. S16.** Elemental projected DOS of the  $\text{Ca}_2\text{B}_2$  monolayer adsorbed with (a) one single Li atom, (b) one layer of Li atoms, (c) one single Na atom, and (d) one layer of Na atoms, respectively. The Fermi energy levels are set as zero.

## 8. Li/Na diffusion on $\text{Mg}_2\text{B}_2$ and $\text{Ca}_2\text{B}_2$ monolayers

**Table S8.** Diffusion energy barriers ( $E_{\text{barrier}}$ ) and diffusivities ( $D$ ) of Li/Na on IIA metal MBene monolayers, transition metal MBene monolayers and Graphene.

|                               | Li                         |                                | Na                         |                                |
|-------------------------------|----------------------------|--------------------------------|----------------------------|--------------------------------|
|                               | $E_{\text{barrier}}$ (meV) | $D$ ( $\text{cm}^2/\text{s}$ ) | $E_{\text{barrier}}$ (meV) | $D$ ( $\text{cm}^2/\text{s}$ ) |
| $\text{Ca}_2\text{B}_2$       | 16                         | $3.7\text{E-}03$               | 12                         | $4.3\text{E-}03$               |
| $\text{Mg}_2\text{B}_2$       | 27                         | $2.6\text{E-}03$               | 14                         | $4.3\text{E-}03$               |
| $\text{Sc}_2\text{B}_2^{[1]}$ | 3                          | $3.0\text{E-}04$               | --                         | --                             |

|                                               |     |         |    |         |
|-----------------------------------------------|-----|---------|----|---------|
| Ti <sub>2</sub> B <sub>2</sub> <sup>[2]</sup> | 4   | 2.6E-04 | -- | --      |
| Zr <sub>2</sub> B <sub>2</sub> <sup>[3]</sup> | 4   | 2.8E-04 | -- | --      |
| Y <sub>2</sub> B <sub>2</sub> <sup>[4]</sup>  | 13  | 1.0E-02 | 8  | 1.3E-02 |
| Graphene <sup>[5]</sup>                       | 300 | 6.0E-07 | -- | --      |

## 9. Comparison with other anode materials

**Table S9.** Diffusion energy barriers ( $E_{\text{barrier}}$ ), specific capacities ( $C$ ) and average open circuit voltages ( $V_{\text{ave}}$ ) of Li on IIA metal MBene monolayers, transition metal MBene monolayers, Ti<sub>3</sub>C<sub>2</sub>, and Graphite.

| monolayer                                     | $E_{\text{barrier}}$ (meV) | $C$ (mAh/g) | $V_{\text{ave}}$ (V) |
|-----------------------------------------------|----------------------------|-------------|----------------------|
| Mg <sub>2</sub> B <sub>2</sub>                | 27                         | 764         | 0.395                |
| Ca <sub>2</sub> B <sub>2</sub>                | 16                         | 527         | 0.275                |
| Zr <sub>2</sub> B <sub>2</sub> <sup>[3]</sup> | 17                         | 526         | 0.236                |
| Sc <sub>2</sub> B <sub>2</sub> <sup>[1]</sup> | 3                          | 480         | 0.410                |
| Ti <sub>2</sub> B <sub>2</sub> <sup>[2]</sup> | 17                         | 456         | 0.526                |
| Fe <sub>2</sub> B <sub>2</sub> <sup>[6]</sup> | 240                        | 665         | 0.330                |
| Mo <sub>2</sub> B <sub>2</sub> <sup>[6]</sup> | 270                        | 444         | 0.410                |
| Ti <sub>3</sub> C <sub>2</sub> <sup>[7]</sup> | 70                         | 448         | 0.413                |
| Graphite <sup>[8]</sup>                       | 450-1200                   | 372         | --                   |

**Table S10.** Diffusion energy barriers ( $E_{\text{barrier}}$ ), specific capacities ( $C$ ) and average open circuit voltages ( $V_{\text{ave}}$ ) of Na on IIA metal MBene monolayers, transition metal MBene monolayers, Ti<sub>3</sub>C<sub>2</sub>, MoS<sub>2</sub>, BCN, and Graphene.

| monolayer                                     | $E_{\text{barrier}}$ (meV) | $C$ (mAh/g) | $V_{\text{ave}}$ (V) |
|-----------------------------------------------|----------------------------|-------------|----------------------|
| Mg <sub>2</sub> B <sub>2</sub>                | 14                         | 859         | 0.279                |
| Ca <sub>2</sub> B <sub>2</sub>                | 12                         | 527         | 0.362                |
| MoC <sub>2</sub> <sup>[9]</sup>               | 230                        | 447         | 0.280                |
| Ti <sub>2</sub> B <sub>2</sub> <sup>[2]</sup> | 8                          | 342         | 0.502                |
| Ti <sub>3</sub> C <sub>2</sub> <sup>[7]</sup> | 96                         | 352         | 0.137                |
| MoS <sub>2</sub> <sup>[10]</sup>              | 280                        | 146         | 0.750                |

|                         |     |     |       |
|-------------------------|-----|-----|-------|
| BCN <sup>[11]</sup>     | 260 | 647 | 0.340 |
| Graphene <sup>[5]</sup> | 130 | --  | --    |

## 10. Anode performance of multilayers

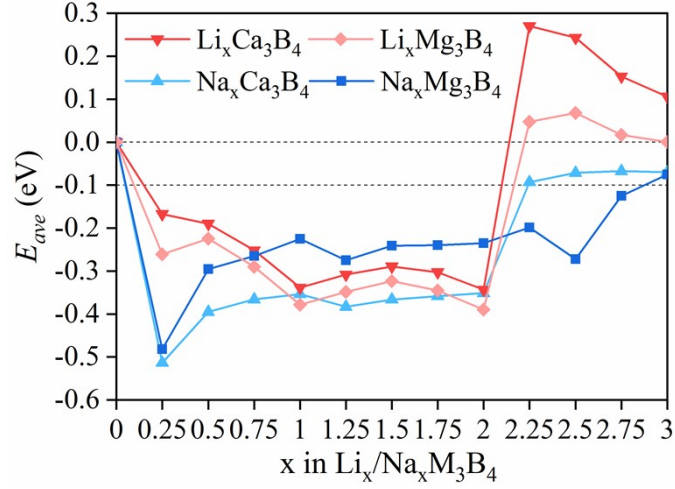

**Fig. S17.** Average adsorption energies ( $E_{ave}$ ) of the  $\text{Li}_x/\text{Na}_x\text{M}_3\text{B}_4$  configurations at different Li/Na concentrations ( $x$ , from 0 to 3 by step 0.25). The configurations with values of  $E_{ave}$  in the range of -0.1 to 0 eV are considered to be energetically unstable.

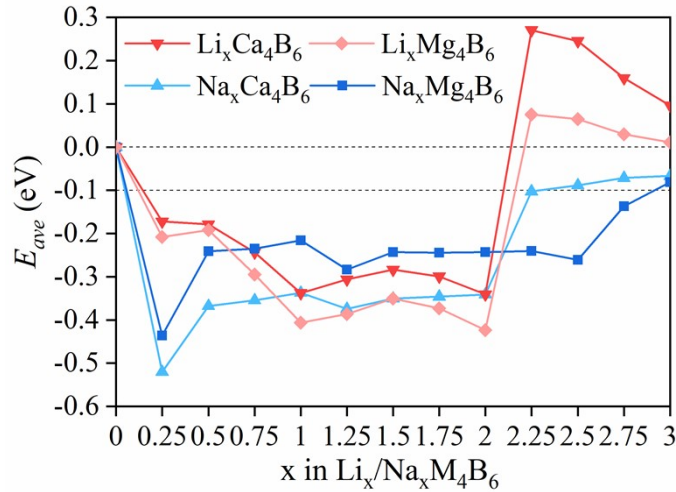

**Fig. S18.** Average adsorption energies ( $E_{ave}$ ) of the  $\text{Li}_x/\text{Na}_x\text{M}_4\text{B}_6$  configurations at different Li/Na concentrations ( $x$ , from 0 to 3 by step 0.25). The configurations with

values of  $E_{\text{ave}}$  in the range of -0.1 to 0 eV are considered to be energetically unstable.

**Table S11.** The energy differences (eV) of  $E_{\text{ave}}$  between the  $\text{Li}_x/\text{Na}_x\text{M}_3\text{B}_4$  and  $\text{Li}_x/\text{Na}_x\text{M}_2\text{B}_2$  configurations.

| x    | $\text{Li}_x\text{Ca}_3\text{B}_4$ | $\text{Na}_x\text{Ca}_3\text{B}_4$ | $\text{Li}_x\text{Mg}_3\text{B}_4$ | $\text{Na}_x\text{Mg}_3\text{B}_4$ |
|------|------------------------------------|------------------------------------|------------------------------------|------------------------------------|
| 0    | 0.000                              | 0.000                              | 0.000                              | 0.000                              |
| 0.25 | -0.065                             | -0.037                             | 0.026                              | 0.050                              |
| 0.5  | -0.047                             | 0.031                              | -0.016                             | -0.014                             |
| 0.75 | -0.056                             | -0.017                             | 0.004                              | -0.017                             |
| 1    | -0.073                             | -0.021                             | 0.021                              | 0.025                              |
| 1.25 | -0.073                             | -0.022                             | 0.010                              | 0.023                              |
| 1.5  | -0.061                             | -0.011                             | 0.026                              | 0.016                              |
| 1.75 | -0.056                             | -0.010                             | 0.031                              | 0.020                              |
| 2    | -0.068                             | -0.006                             | 0.041                              | 0.037                              |
| 2.25 | 0.024                              | -0.090                             | -0.104                             | -0.085                             |
| 2.5  | 0.144                              | -0.004                             | 0.049                              | -0.193                             |
| 2.75 | 0.190                              | 0.024                              | 0.080                              | -0.068                             |
| 3    | 0.262                              | 0.063                              | 0.165                              | -0.015                             |

**Table S12.** The energy differences (eV) of  $E_{\text{ave}}$  between the  $\text{Li}_x/\text{Na}_x\text{M}_4\text{B}_6$  and  $\text{Li}_x/\text{Na}_x\text{M}_2\text{B}_2$  configurations.

| x    | $\text{Li}_x\text{Ca}_4\text{B}_6$ | $\text{Na}_x\text{Ca}_4\text{B}_6$ | $\text{Li}_x\text{Mg}_4\text{B}_6$ | $\text{Na}_x\text{Mg}_4\text{B}_6$ |
|------|------------------------------------|------------------------------------|------------------------------------|------------------------------------|
| 0    | 0.000                              | 0.000                              | 0.000                              | 0.000                              |
| 0.25 | -0.070                             | -0.044                             | 0.079                              | 0.096                              |
| 0.5  | -0.036                             | 0.058                              | 0.017                              | 0.040                              |
| 0.75 | -0.048                             | -0.005                             | -0.001                             | 0.013                              |
| 1    | -0.072                             | -0.004                             | -0.008                             | 0.034                              |
| 1.25 | -0.071                             | -0.013                             | -0.028                             | 0.015                              |
| 1.5  | -0.055                             | 0.005                              | -0.001                             | 0.014                              |
| 1.75 | -0.053                             | 0.002                              | 0.003                              | 0.016                              |
| 2    | -0.066                             | 0.004                              | 0.007                              | 0.029                              |
| 2.25 | 0.025                              | -0.099                             | -0.076                             | -0.127                             |
| 2.5  | 0.147                              | -0.022                             | 0.046                              | -0.181                             |
| 2.75 | 0.197                              | 0.020                              | 0.092                              | -0.080                             |

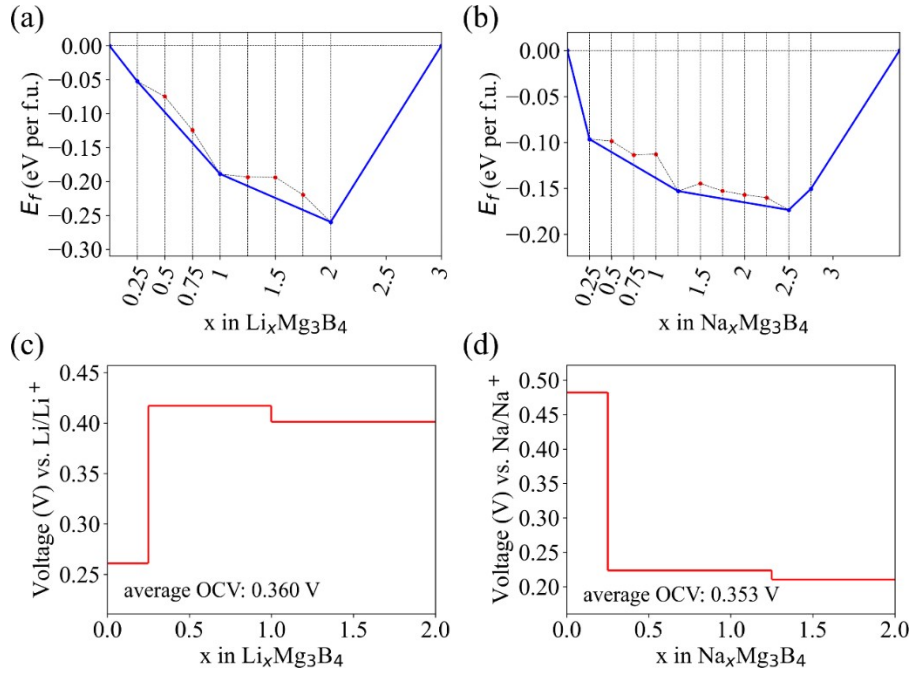

**Fig. S19.** The convex hulls of  $E_f$  for (a)  $\text{Li}_x\text{Mg}_3\text{B}_4$  and (b)  $\text{Na}_x\text{Mg}_3\text{B}_4$  configurations and OCV profiles of (c)  $\text{Li}_x\text{Mg}_3\text{B}_4$  against  $\text{Li}/\text{Li}^+$  and (d)  $\text{Na}_x\text{Mg}_3\text{B}_4$  against  $\text{Na}/\text{Na}^+$ .

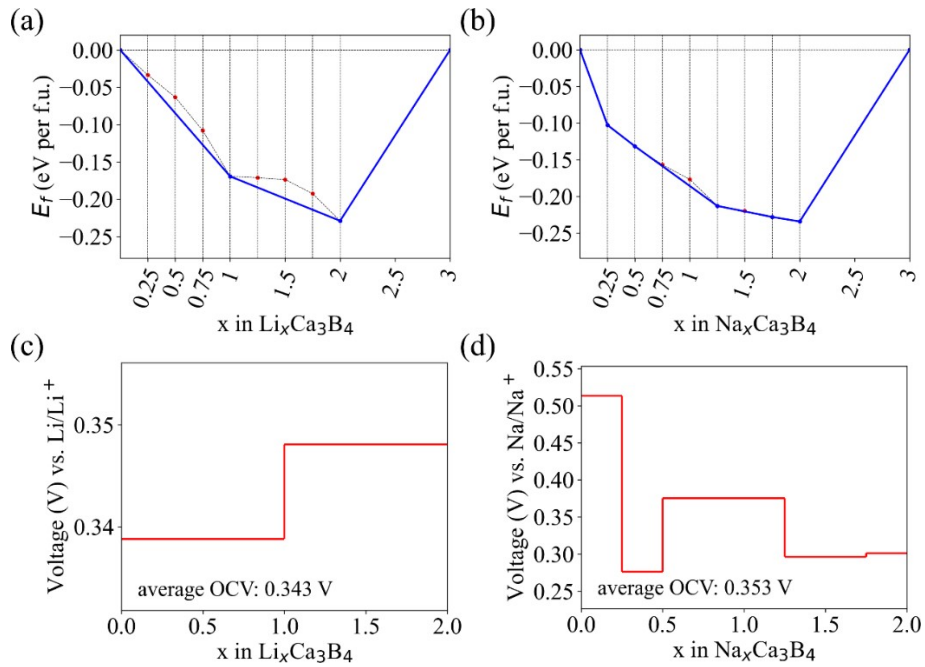

**Fig. S20.** The convex hulls of  $E_f$  for (a)  $\text{Li}_x\text{Ca}_3\text{B}_4$  and (b)  $\text{Na}_x\text{Ca}_3\text{B}_4$  configurations and OCV profiles of (c)  $\text{Li}_x\text{Ca}_3\text{B}_4$  against  $\text{Li}/\text{Li}^+$  and (d)  $\text{Na}_x\text{Ca}_3\text{B}_4$  against  $\text{Na}/\text{Na}^+$ .

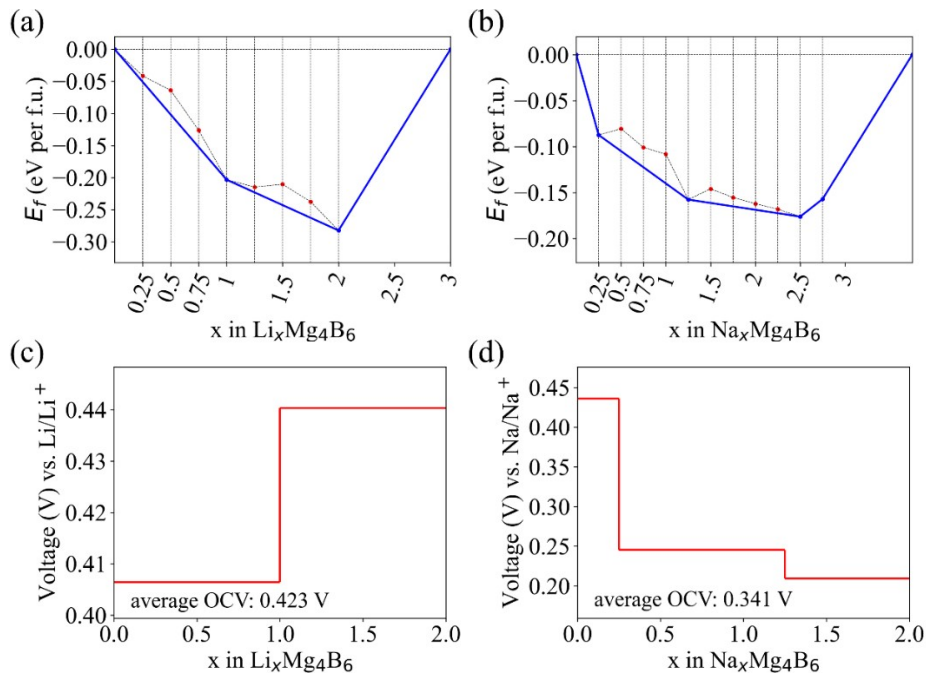

**Fig. S21.** The convex hulls of  $E_f$  for (a)  $\text{Li}_x\text{Mg}_4\text{B}_6$  and (b)  $\text{Na}_x\text{Mg}_4\text{B}_6$  configurations and OCV profiles of (c)  $\text{Li}_x\text{Mg}_4\text{B}_6$  against  $\text{Li}/\text{Li}^+$  and (d)  $\text{Na}_x\text{Mg}_4\text{B}_6$  against  $\text{Na}/\text{Na}^+$ .



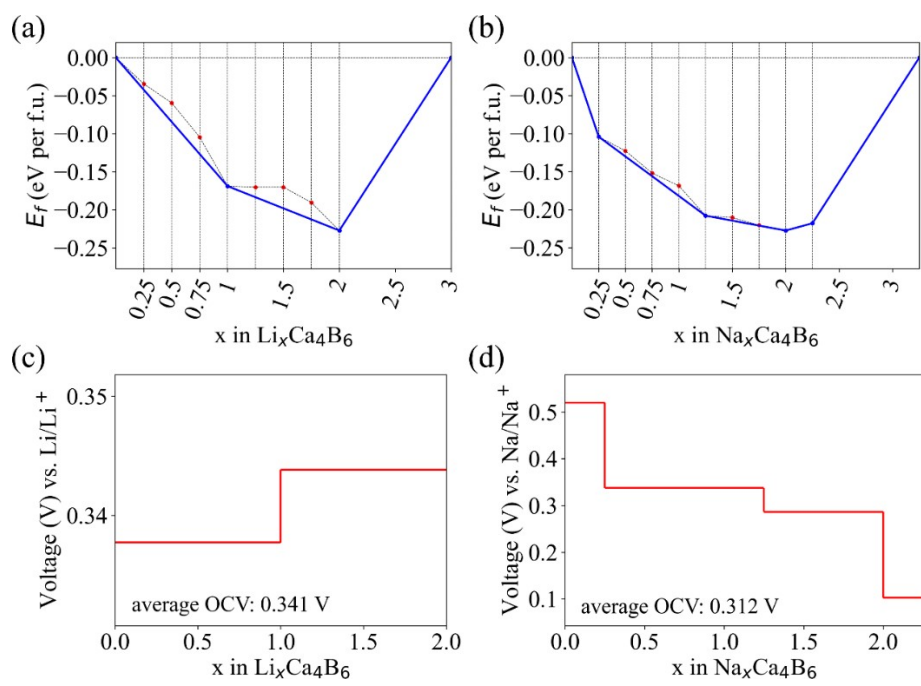

**Fig. S22.** The convex hulls of  $E_f$  for (a)  $\text{Li}_x\text{Ca}_4\text{B}_6$  and (b)  $\text{Na}_x\text{Ca}_4\text{B}_6$  configurations and OCV profiles of (c)  $\text{Li}_x\text{Ca}_4\text{B}_6$  against  $\text{Li}/\text{Li}^+$  and (d)  $\text{Na}_x\text{Ca}_4\text{B}_6$  against  $\text{Na}/\text{Na}^+$ .

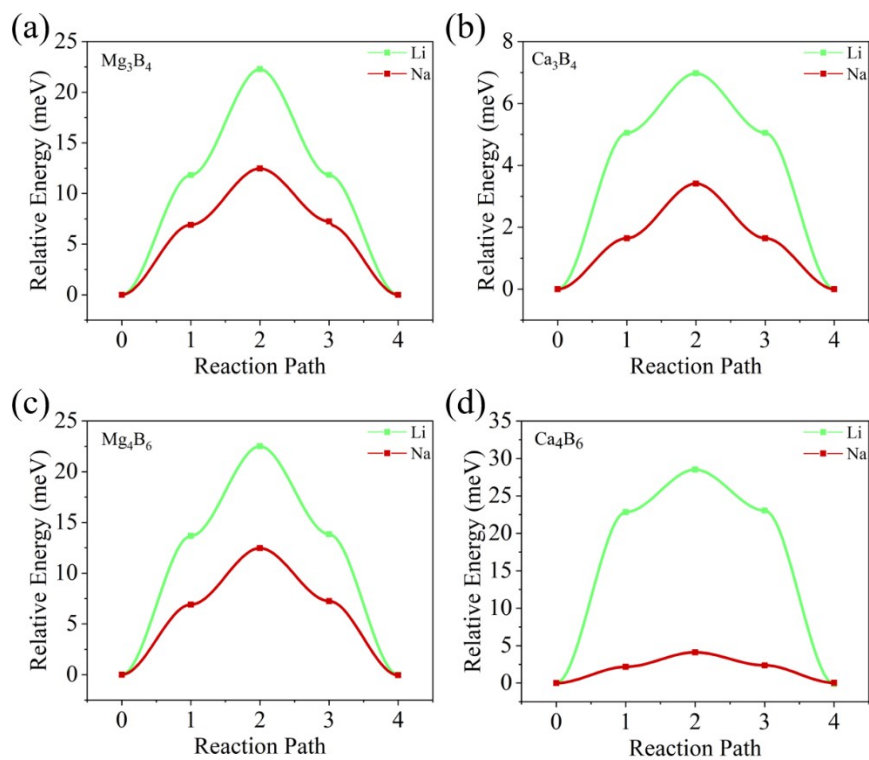

**Fig. S23.** The Li/Na diffusion energy barriers (meV) for (a)  $\text{Mg}_3\text{B}_4$ , (b)  $\text{Ca}_3\text{B}_4$  (c)  $\text{Mg}_4\text{B}_6$  and (d)  $\text{Ca}_4\text{B}_6$  multilayers.

## 11. Effect of functionalization

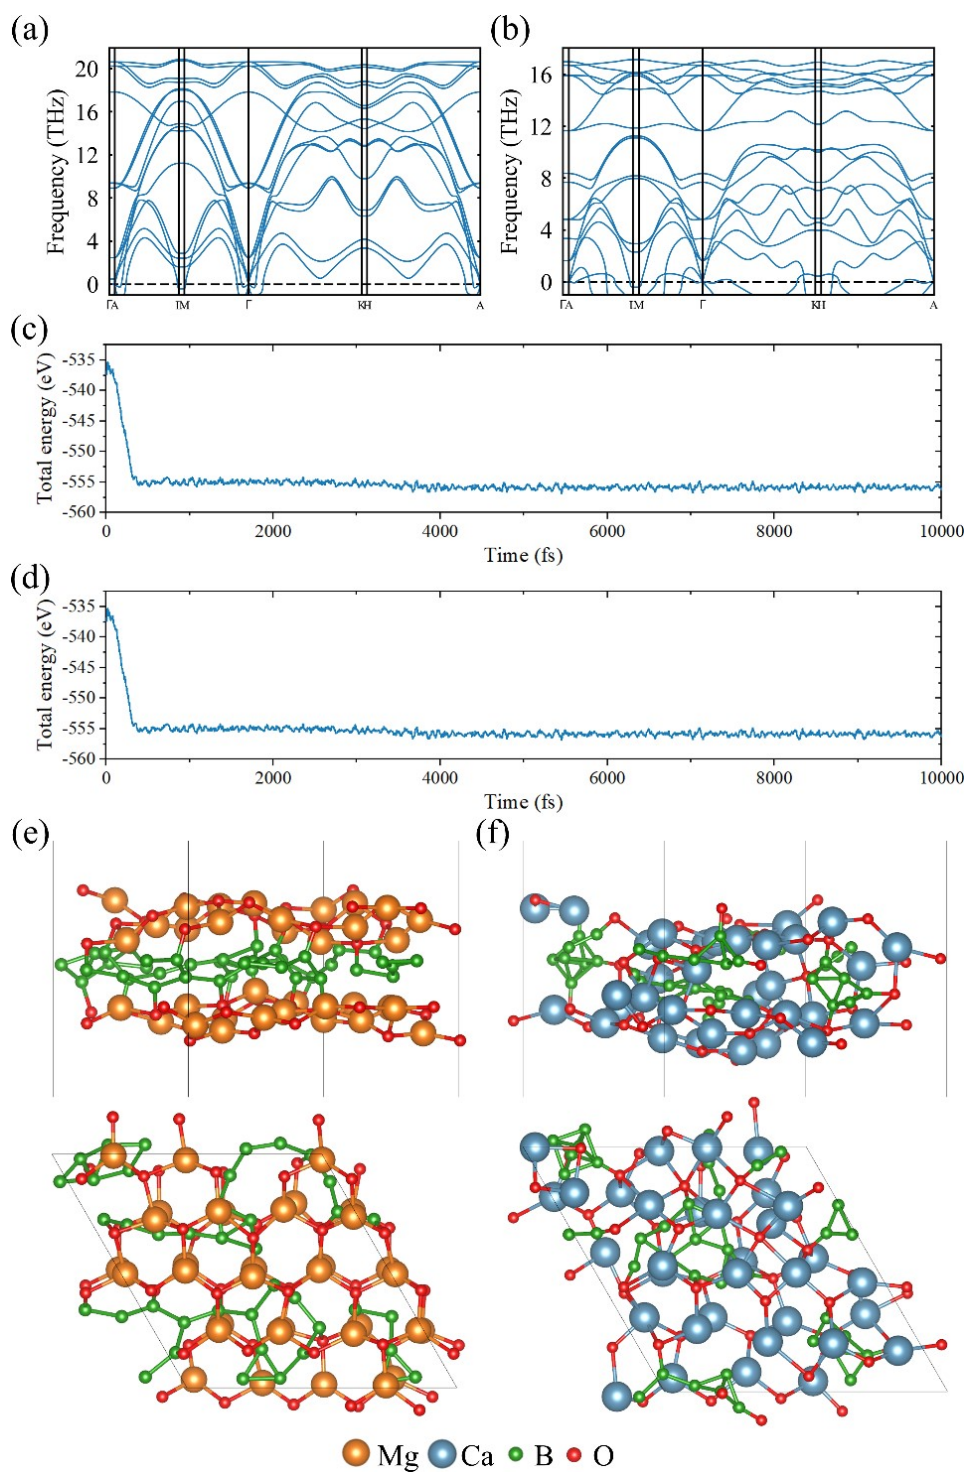

**Fig. S24.** Phonon spectra along the high symmetry directions for (a)  $\text{Mg}_2\text{B}_2\text{O}_2$  and (b)

Ca<sub>2</sub>B<sub>2</sub>O<sub>2</sub>. Total energy fluctuations of (c) Mg<sub>2</sub>B<sub>2</sub>O<sub>2</sub> and (d) Ca<sub>2</sub>B<sub>2</sub>O<sub>2</sub> in the AIMD simulation at 300 K for 10 ps and the corresponding structure snapshots of (e) Mg<sub>2</sub>B<sub>2</sub>O<sub>2</sub> and (f) Ca<sub>2</sub>B<sub>2</sub>O<sub>2</sub>.

## Appendix

The POSCARs and CONTCARs for fully lithiated and sodiated Mg<sub>2</sub>B<sub>2</sub> and Ca<sub>2</sub>B<sub>2</sub>:

Li8 Mg8 B8 (POSCAR)

```

1.0000000000000000
  6.1710360018532819    0.0000000062764495    0.0000000000000000
-3.0855120015850690    5.3442746302461277    0.0000000000000000
  0.0000000000000000    0.0000000000000000    33.0505128388136953

```

```

Li  Mg  B
  8   8   8

```

Direct

```

0.3333340000000007  0.1666659999999993  0.6223978493336166
0.3333340000000007  0.6666659999999993  0.6223978493336166
0.8333340000000007  0.1666659999999993  0.6223978493336166
0.8333340000000007  0.6666659999999993  0.6223978493336166
0.3333340000000007  0.1666659999999993  0.3776021506663834
0.3333340000000007  0.6666659999999993  0.3776021506663834
0.8333340000000007  0.1666659999999993  0.3776021506663834
0.8333340000000007  0.6666659999999993  0.3776021506663834
0.0000000000000000  0.0000000000000000  0.4490690701310235
0.0000000000000000  0.5000000000000000  0.4490690701310235
0.5000000000000000  0.0000000000000000  0.4490690701310235

```

|                    |                    |                    |
|--------------------|--------------------|--------------------|
| 0.5000000000000000 | 0.5000000000000000 | 0.4490690701310235 |
| 0.0000000000000000 | 0.0000000000000000 | 0.5509309298689765 |
| 0.0000000000000000 | 0.5000000000000000 | 0.5509309298689765 |
| 0.5000000000000000 | 0.0000000000000000 | 0.5509309298689765 |
| 0.5000000000000000 | 0.5000000000000000 | 0.5509309298689765 |
| 0.3333340000000007 | 0.1666659999999993 | 0.5000000000000000 |
| 0.3333340000000007 | 0.6666659999999993 | 0.5000000000000000 |
| 0.8333340000000007 | 0.1666659999999993 | 0.5000000000000000 |
| 0.8333340000000007 | 0.6666659999999993 | 0.5000000000000000 |
| 0.1666659999999993 | 0.3333340000000007 | 0.5000000000000000 |
| 0.1666659999999993 | 0.8333340000000007 | 0.5000000000000000 |
| 0.6666659999999993 | 0.3333340000000007 | 0.5000000000000000 |
| 0.6666659999999993 | 0.8333340000000007 | 0.5000000000000000 |

Li8 Mg8 B8 (CONTCAR)

1.0000000000000000

|                    |                    |                    |
|--------------------|--------------------|--------------------|
| 6.1710337692259110 | 0.0000000062739385 | 0.0000000000000000 |
|--------------------|--------------------|--------------------|

|                     |                    |                    |
|---------------------|--------------------|--------------------|
| -3.0855108852757263 | 5.3442726967346150 | 0.0000000000000000 |
|---------------------|--------------------|--------------------|

|                    |                    |                     |
|--------------------|--------------------|---------------------|
| 0.0000000000000000 | 0.0000000000000000 | 33.0505128388136953 |
|--------------------|--------------------|---------------------|

|    |    |   |
|----|----|---|
| Li | Mg | B |
| 8  | 8  | 8 |

Direct

|                    |                    |                    |
|--------------------|--------------------|--------------------|
| 0.3333340000000007 | 0.1666659999999993 | 0.6223961020882811 |
| 0.3333340000000007 | 0.6666659999999993 | 0.6223961020882811 |
| 0.8333340000000007 | 0.1666659999999993 | 0.6223961020882811 |
| 0.8333340000000007 | 0.6666659999999993 | 0.6223961020882811 |
| 0.3333340000000007 | 0.1666659999999993 | 0.3776038979117189 |
| 0.3333340000000007 | 0.6666659999999993 | 0.3776038979117189 |

|                    |                    |                    |
|--------------------|--------------------|--------------------|
| 0.8333340000000007 | 0.1666659999999993 | 0.3776038979117189 |
| 0.8333340000000007 | 0.6666659999999993 | 0.3776038979117189 |
| 0.0000000000000000 | 0.0000000000000000 | 0.4490700066170774 |
| 0.0000000000000000 | 0.5000000000000000 | 0.4490700066170774 |
| 0.5000000000000000 | 0.0000000000000000 | 0.4490700066170774 |
| 0.5000000000000000 | 0.5000000000000000 | 0.4490700066170774 |
| 0.0000000000000000 | 0.0000000000000000 | 0.5509299933829226 |
| 0.0000000000000000 | 0.5000000000000000 | 0.5509299933829226 |
| 0.5000000000000000 | 0.0000000000000000 | 0.5509299933829226 |
| 0.5000000000000000 | 0.5000000000000000 | 0.5509299933829226 |
| 0.3333340000000007 | 0.1666659999999993 | 0.5000000000000000 |
| 0.3333340000000007 | 0.6666659999999993 | 0.5000000000000000 |
| 0.8333340000000007 | 0.1666659999999993 | 0.5000000000000000 |
| 0.8333340000000007 | 0.6666659999999993 | 0.5000000000000000 |
| 0.1666659999999993 | 0.3333340000000007 | 0.5000000000000000 |
| 0.1666659999999993 | 0.8333340000000007 | 0.5000000000000000 |
| 0.6666659999999993 | 0.3333340000000007 | 0.5000000000000000 |
| 0.6666659999999993 | 0.8333340000000007 | 0.5000000000000000 |

Li8 Ca8 B8 (POSCAR)

1.0000000000000000

|                     |                     |                     |
|---------------------|---------------------|---------------------|
| 6.6155715783610543  | -0.0000001262391976 | 0.0000000000000000  |
| -3.3077725841691019 | 5.7292580307680225  | 0.0000000000000000  |
| 0.0000000000000000  | 0.0000000000000000  | 33.3047817894384721 |

Li Ca B

8 8 8

Direct

|                    |                    |                    |
|--------------------|--------------------|--------------------|
| 0.3333340000000007 | 0.1666659999999993 | 0.3601218216550399 |
| 0.3333340000000007 | 0.6666659999999993 | 0.3601218216550399 |

|                    |                    |                    |
|--------------------|--------------------|--------------------|
| 0.8333340000000007 | 0.1666659999999993 | 0.3601218216550399 |
| 0.8333340000000007 | 0.6666659999999993 | 0.3601218216550399 |
| 0.3333340000000007 | 0.1666659999999993 | 0.6398781783451165 |
| 0.3333340000000007 | 0.6666659999999993 | 0.6398781783451165 |
| 0.8333340000000007 | 0.1666659999999993 | 0.6398781783451165 |
| 0.8333340000000007 | 0.6666659999999993 | 0.6398781783451165 |
| 0.0000000000000000 | 0.0000000000000000 | 0.4432636271042920 |
| 0.0000000000000000 | 0.5000000000000000 | 0.4432636271042920 |
| 0.5000000000000000 | 0.0000000000000000 | 0.4432636271042920 |
| 0.5000000000000000 | 0.5000000000000000 | 0.4432636271042920 |
| 0.0000000000000000 | 0.0000000000000000 | 0.5567363728956298 |
| 0.0000000000000000 | 0.5000000000000000 | 0.5567363728956298 |
| 0.5000000000000000 | 0.0000000000000000 | 0.5567363728956298 |
| 0.5000000000000000 | 0.5000000000000000 | 0.5567363728956298 |
| 0.3333340000000007 | 0.1666659999999993 | 0.5000000000000000 |
| 0.3333340000000007 | 0.6666659999999993 | 0.5000000000000000 |
| 0.8333340000000007 | 0.1666659999999993 | 0.5000000000000000 |
| 0.8333340000000007 | 0.6666659999999993 | 0.5000000000000000 |
| 0.1666659999999993 | 0.3333340000000007 | 0.5000000000000000 |
| 0.1666659999999993 | 0.8333340000000007 | 0.5000000000000000 |
| 0.6666659999999993 | 0.3333340000000007 | 0.5000000000000000 |
| 0.6666659999999993 | 0.8333340000000007 | 0.5000000000000000 |

Li8 Ca8 B8 (CONTCAR)

1.0000000000000000

|                     |                     |                     |
|---------------------|---------------------|---------------------|
| 6.6145515361117964  | -0.0000001285509600 | 0.0000000000000000  |
| -3.3072625670994329 | 5.7283746471474082  | 0.0000000000000000  |
| 0.0000000000000000  | 0.0000000000000000  | 33.3047817894384721 |

Li Ca B



8 8 8

Direct

|                    |                    |                    |
|--------------------|--------------------|--------------------|
| 0.3333340000000007 | 0.1666659999999993 | 0.3601212273169622 |
| 0.3333340000000007 | 0.6666659999999993 | 0.3601212273169622 |
| 0.8333340000000007 | 0.1666659999999993 | 0.3601212273169622 |
| 0.8333340000000007 | 0.6666659999999993 | 0.3601212273169622 |
| 0.3333340000000007 | 0.1666659999999993 | 0.6398787726831945 |
| 0.3333340000000007 | 0.6666659999999993 | 0.6398787726831945 |
| 0.8333340000000007 | 0.1666659999999993 | 0.6398787726831945 |
| 0.8333340000000007 | 0.6666659999999993 | 0.6398787726831945 |
| 0.0000000000000000 | 0.0000000000000000 | 0.4432577474539330 |
| 0.0000000000000000 | 0.5000000000000000 | 0.4432577474539330 |
| 0.5000000000000000 | 0.0000000000000000 | 0.4432577474539330 |
| 0.5000000000000000 | 0.5000000000000000 | 0.4432577474539330 |
| 0.0000000000000000 | 0.0000000000000000 | 0.5567422525459885 |
| 0.0000000000000000 | 0.5000000000000000 | 0.5567422525459885 |
| 0.5000000000000000 | 0.0000000000000000 | 0.5567422525459885 |
| 0.5000000000000000 | 0.5000000000000000 | 0.5567422525459885 |
| 0.3333340000000007 | 0.1666659999999993 | 0.5000000000000000 |
| 0.3333340000000007 | 0.6666659999999993 | 0.5000000000000000 |
| 0.8333340000000007 | 0.1666659999999993 | 0.5000000000000000 |
| 0.8333340000000007 | 0.6666659999999993 | 0.5000000000000000 |
| 0.1666659999999993 | 0.3333340000000007 | 0.5000000000000000 |
| 0.1666659999999993 | 0.8333340000000007 | 0.5000000000000000 |
| 0.6666659999999993 | 0.3333340000000007 | 0.5000000000000000 |
| 0.6666659999999993 | 0.8333340000000007 | 0.5000000000000000 |

Na8 Mg8 B8 (POSCAR)

1.0000000000000000

|                     |                    |                     |
|---------------------|--------------------|---------------------|
| 6.3063046570740191  | 0.0000001671392878 | 0.0000000000000000  |
| -3.1531460584981676 | 5.4614206885561991 | 0.0000000000000000  |
| 0.0000000000000000  | 0.0000000000000000 | 33.0505128388136953 |

|    |    |   |
|----|----|---|
| Na | Mg | B |
| 8  | 8  | 8 |

Direct

|                    |                    |                    |
|--------------------|--------------------|--------------------|
| 0.3333340000000007 | 0.1666659999999993 | 0.6364322576283322 |
| 0.3333340000000007 | 0.6666659999999993 | 0.6364322576283322 |
| 0.8333340000000007 | 0.1666659999999993 | 0.6364322576283322 |
| 0.8333340000000007 | 0.6666659999999993 | 0.6364322576283322 |
| 0.3333340000000007 | 0.1666659999999993 | 0.3635677423716747 |
| 0.3333340000000007 | 0.6666659999999993 | 0.3635677423716747 |
| 0.8333340000000007 | 0.1666659999999993 | 0.3635677423716747 |
| 0.8333340000000007 | 0.6666659999999993 | 0.3635677423716747 |
| 0.0000000000000000 | 0.0000000000000000 | 0.4499417586157406 |
| 0.0000000000000000 | 0.5000000000000000 | 0.4499417586157406 |
| 0.5000000000000000 | 0.0000000000000000 | 0.4499417586157406 |
| 0.5000000000000000 | 0.5000000000000000 | 0.4499417586157406 |
| 0.0000000000000000 | 0.0000000000000000 | 0.5500582413842665 |
| 0.0000000000000000 | 0.5000000000000000 | 0.5500582413842665 |
| 0.5000000000000000 | 0.0000000000000000 | 0.5500582413842665 |
| 0.5000000000000000 | 0.5000000000000000 | 0.5500582413842665 |
| 0.3333340000000007 | 0.1666659999999993 | 0.5000000000000000 |
| 0.3333340000000007 | 0.6666659999999993 | 0.5000000000000000 |
| 0.8333340000000007 | 0.1666659999999993 | 0.5000000000000000 |
| 0.8333340000000007 | 0.6666659999999993 | 0.5000000000000000 |
| 0.1666659999999993 | 0.3333340000000007 | 0.5000000000000000 |
| 0.1666659999999993 | 0.8333340000000007 | 0.5000000000000000 |

0.6666659999999993 0.3333340000000007 0.5000000000000000  
0.6666659999999993 0.8333340000000007 0.5000000000000000

Na8 Mg8 B8 (CONTCAR)

1.0000000000000000  
6.3063037611449602 0.0000001671382117 0.0000000000000000  
-3.1531456105354403 5.4614199126590988 0.0000000000000000  
0.0000000000000000 0.0000000000000000 33.0505128388136953

Na Mg B  
8 8 8

Direct

0.3333340000000007 0.1666659999999993 0.6364323061838356  
0.3333340000000007 0.6666659999999993 0.6364323061838356  
0.8333340000000007 0.1666659999999993 0.6364323061838356  
0.8333340000000007 0.6666659999999993 0.6364323061838356  
0.3333340000000007 0.1666659999999993 0.3635676938161716  
0.3333340000000007 0.6666659999999993 0.3635676938161716  
0.8333340000000007 0.1666659999999993 0.3635676938161716  
0.8333340000000007 0.6666659999999993 0.3635676938161716  
-0.0000000000000000 0.0000000000000000 0.4499418214084155  
-0.0000000000000000 0.5000000000000000 0.4499418214084155  
0.5000000000000000 0.0000000000000000 0.4499418214084155  
0.5000000000000000 0.5000000000000000 0.4499418214084155  
-0.0000000000000000 0.0000000000000000 0.5500581785915916  
-0.0000000000000000 0.5000000000000000 0.5500581785915916  
0.5000000000000000 0.0000000000000000 0.5500581785915916  
0.5000000000000000 0.5000000000000000 0.5500581785915916  
0.3333340000000007 0.1666659999999993 0.5000000000000000

|                    |                    |                    |
|--------------------|--------------------|--------------------|
| 0.3333340000000007 | 0.6666659999999993 | 0.5000000000000000 |
| 0.8333340000000007 | 0.1666659999999993 | 0.5000000000000000 |
| 0.8333340000000007 | 0.6666659999999993 | 0.5000000000000000 |
| 0.1666659999999993 | 0.3333340000000007 | 0.5000000000000000 |
| 0.1666659999999993 | 0.8333340000000007 | 0.5000000000000000 |
| 0.6666659999999993 | 0.3333340000000007 | 0.5000000000000000 |
| 0.6666659999999993 | 0.8333340000000007 | 0.5000000000000000 |

Na8 Ca8 B8 (POSCAR)

1.0000000000000000

|                    |                    |                    |
|--------------------|--------------------|--------------------|
| 6.7351088810539492 | 0.0000001525283601 | 0.0000000000000000 |
|--------------------|--------------------|--------------------|

|                     |                    |                    |
|---------------------|--------------------|--------------------|
| -3.3675407535176314 | 5.8327805040108354 | 0.0000000000000000 |
|---------------------|--------------------|--------------------|

|                    |                    |                     |
|--------------------|--------------------|---------------------|
| 0.0000000000000000 | 0.0000000000000000 | 33.3047817894384721 |
|--------------------|--------------------|---------------------|

|    |    |   |
|----|----|---|
| Na | Ca | B |
| 8  | 8  | 8 |

Direct

|                     |                     |                    |
|---------------------|---------------------|--------------------|
| 0.3333340000000007  | 0.1666659999999993  | 0.3471600943872775 |
| 0.3333340000000007  | 0.6666659999999993  | 0.3471600943872775 |
| 0.8333340000000007  | 0.1666659999999993  | 0.3471600943872775 |
| 0.8333340000000007  | 0.6666659999999993  | 0.3471600943872775 |
| 0.1666659999999993  | 0.3333340000000007  | 0.6528399056127319 |
| 0.1666659999999993  | 0.8333340000000007  | 0.6528399056127319 |
| 0.6666659999999993  | 0.3333340000000007  | 0.6528399056127319 |
| 0.6666659999999993  | 0.8333340000000007  | 0.6528399056127319 |
| -0.0000000000000000 | -0.0000000000000000 | 0.4440844743546665 |
| -0.0000000000000000 | 0.5000000000000000  | 0.4440844743546665 |
| 0.5000000000000000  | -0.0000000000000000 | 0.4440844743546665 |
| 0.5000000000000000  | 0.5000000000000000  | 0.4440844743546665 |

|                     |                     |                    |
|---------------------|---------------------|--------------------|
| -0.0000000000000000 | -0.0000000000000000 | 0.5559155256453013 |
| -0.0000000000000000 | 0.5000000000000000  | 0.5559155256453013 |
| 0.5000000000000000  | -0.0000000000000000 | 0.5559155256453013 |
| 0.5000000000000000  | 0.5000000000000000  | 0.5559155256453013 |
| 0.3333340000000007  | 0.1666659999999993  | 0.4999686647572359 |
| 0.3333340000000007  | 0.6666659999999993  | 0.4999686647572359 |
| 0.8333340000000007  | 0.1666659999999993  | 0.4999686647572359 |
| 0.8333340000000007  | 0.6666659999999993  | 0.4999686647572359 |
| 0.1666659999999993  | 0.3333340000000007  | 0.5000313352427621 |
| 0.1666659999999993  | 0.8333340000000007  | 0.5000313352427621 |
| 0.6666659999999993  | 0.3333340000000007  | 0.5000313352427621 |
| 0.6666659999999993  | 0.8333340000000007  | 0.5000313352427621 |

Na8 Ca8 B8 (CONTCAR)

|                     |                    |                     |
|---------------------|--------------------|---------------------|
| 1.0000000000000000  |                    |                     |
| 6.7349287007819942  | 0.0000001512663633 | 0.0000000000000000  |
| -3.3674506648372144 | 5.8326244629916104 | 0.0000000000000000  |
| 0.0000000000000000  | 0.0000000000000000 | 33.3047817894384721 |

|    |    |   |
|----|----|---|
| Na | Ca | B |
| 8  | 8  | 8 |

Direct

|                    |                    |                    |
|--------------------|--------------------|--------------------|
| 0.3333340000000007 | 0.1666659999999993 | 0.6529440144508669 |
| 0.3333340000000007 | 0.6666659999999993 | 0.6529440144508669 |
| 0.8333340000000007 | 0.1666659999999993 | 0.6529440144508669 |
| 0.8333340000000007 | 0.6666659999999993 | 0.6529440144508669 |
| 0.3333340000000007 | 0.1666659999999993 | 0.3470559855491331 |
| 0.3333340000000007 | 0.6666659999999993 | 0.3470559855491331 |
| 0.8333340000000007 | 0.1666659999999993 | 0.3470559855491331 |

|                    |                    |                    |
|--------------------|--------------------|--------------------|
| 0.8333340000000007 | 0.6666659999999993 | 0.3470559855491331 |
| 0.0000000000000000 | 0.0000000000000000 | 0.4440751606375883 |
| 0.0000000000000000 | 0.5000000000000000 | 0.4440751606375883 |
| 0.5000000000000000 | 0.0000000000000000 | 0.4440751606375883 |
| 0.5000000000000000 | 0.5000000000000000 | 0.4440751606375883 |
| 0.0000000000000000 | 0.0000000000000000 | 0.5559248393623832 |
| 0.0000000000000000 | 0.5000000000000000 | 0.5559248393623832 |
| 0.5000000000000000 | 0.0000000000000000 | 0.5559248393623832 |
| 0.5000000000000000 | 0.5000000000000000 | 0.5559248393623832 |
| 0.3333340000000007 | 0.1666659999999993 | 0.5000000000000000 |
| 0.3333340000000007 | 0.6666659999999993 | 0.5000000000000000 |
| 0.8333340000000007 | 0.1666659999999993 | 0.5000000000000000 |
| 0.8333340000000007 | 0.6666659999999993 | 0.5000000000000000 |
| 0.1666659999999993 | 0.3333340000000007 | 0.5000000000000000 |
| 0.1666659999999993 | 0.8333340000000007 | 0.5000000000000000 |
| 0.6666659999999993 | 0.3333340000000007 | 0.5000000000000000 |
| 0.6666659999999993 | 0.8333340000000007 | 0.5000000000000000 |

## References

[1] Q. He, Z. Li, W. Xiao, C. Zhang, Y. Zhao, Computational investigation of 2D 3d/4d hexagonal transition metal borides for metal-ion batteries, *Electrochimica Acta* 384 (2021) 138404. <https://doi.org/10.1016/j.electacta.2021.138404>.

[2] T. Bo, P.-F. Liu, J. Xu, J. Zhang, Y. Chen, O. Eriksson, F. Wang, B.-T. Wang, Hexagonal  $Ti_2B_2$  monolayer: a promising anode material offering high rate capability for Li-ion and Na-ion batteries, *Phys. Chem. Chem. Phys.* 20 (2018) 22168–22178. <https://doi.org/10.1039/C8CP03362E>.

[3] G. Yuan, T. Bo, X. Qi, P.-F. Liu, Z. Huang, B.-T. Wang, Monolayer  $Zr_2B_2$ : a promising two-dimensional anode material for Li-ion batteries, *Appl. Surf. Sci.* 480 (2019) 448–453. <https://doi.org/10.1016/j.apsusc.2019.02.222>.

[4] S. Gao, J. Hao, X. Zhang, L. Li, C. Zhang, L. Wu, X. Ma, P. Lu, G. Liu, Two dimension transition metal boride  $Y_2B_2$  as a promising anode in Li-ion and

Na-ion batteries, *Comput. Mater. Sci.* 200 (2021) 110776. <https://doi.org/10.1016/j.commatsci.2021.110776>.

[5] M. Liang, L. Zhi, Graphene-based electrode materials for rechargeable lithium batteries, *J. Mater. Chem.* 19 (2009) 5871–5878. <https://doi.org/10.1039/B901551E>.

[6] Z. Guo, J. Zhou, Z. Sun, New two-dimensional transition metal borides for Li ion batteries and electrocatalysis, *J. Mater. Chem. A* 5 (2017) 23530–23535. <https://doi.org/10.1039/C7TA08665B>.

[7] D. Er, J. Li, M. Naguib, Y. Gogotsi, V.B. Shenoy,  $Ti_3C_2$  MXene as a high capacity electrode material for metal (Li, Na, K, Ca) ion batteries, *ACS Appl. Mater. Interfaces* 6 (2014) 11173–11179. <https://doi.org/10.1021/am501144q>.

[8] M. Endo, C. Kim, K. Nishimura, T. Fujino, K. Miyashita, Recent development of carbon materials for Li ion batteries, *Carbon* 38 (2000) 183–197. [https://doi.org/10.1016/S0008-6223\(99\)00141-4](https://doi.org/10.1016/S0008-6223(99)00141-4).

[9] Y. Yu, Z. Guo, Q. Peng, J. Zhou, Z. Sun, Novel two-dimensional molybdenum carbides as high capacity anodes for lithium/sodium-ion batteries, *J. Mater. Chem. A* 7 (2019) 12145–12153. <https://doi.org/10.1039/C9TA02650A>.

[10] M. Mortazavi, C. Wang, J. Deng, V.B. Shenoy, N.V. Medhekar, Ab initio characterization of layered  $MoS_2$  as anode for sodium-ion batteries, *J. Power Sources* 268 (2014) 279–286. <https://doi.org/10.1016/j.jpowsour.2014.06.049>.

[11] A. Kumar, P. Parida, Unveiling the potential of a BCN-biphenylene monolayer as a high-performance anode material for alkali metal ion batteries: a first-principles study, *Nanoscale* 16 (2024) 13131–13147. <https://doi.org/10.1039/D4NR01386G>.
